# Supplementary material for: The impact of site-specific digital histology signatures on deep learning model accuracy and bias
Source: PubMed Central journal article supplement (PMC8292530; doi:10.1038/s41467-021-24698-1), 2021-07-20
Supplement: 41467_2021_24698_MOESM1_ESM.pdf [file 41467_2021_24698_MOESM1_ESM.pdf]

# The Impact of Site-Specific Digital Histology Signatures on Deep Learning Model Accuracy and Bias

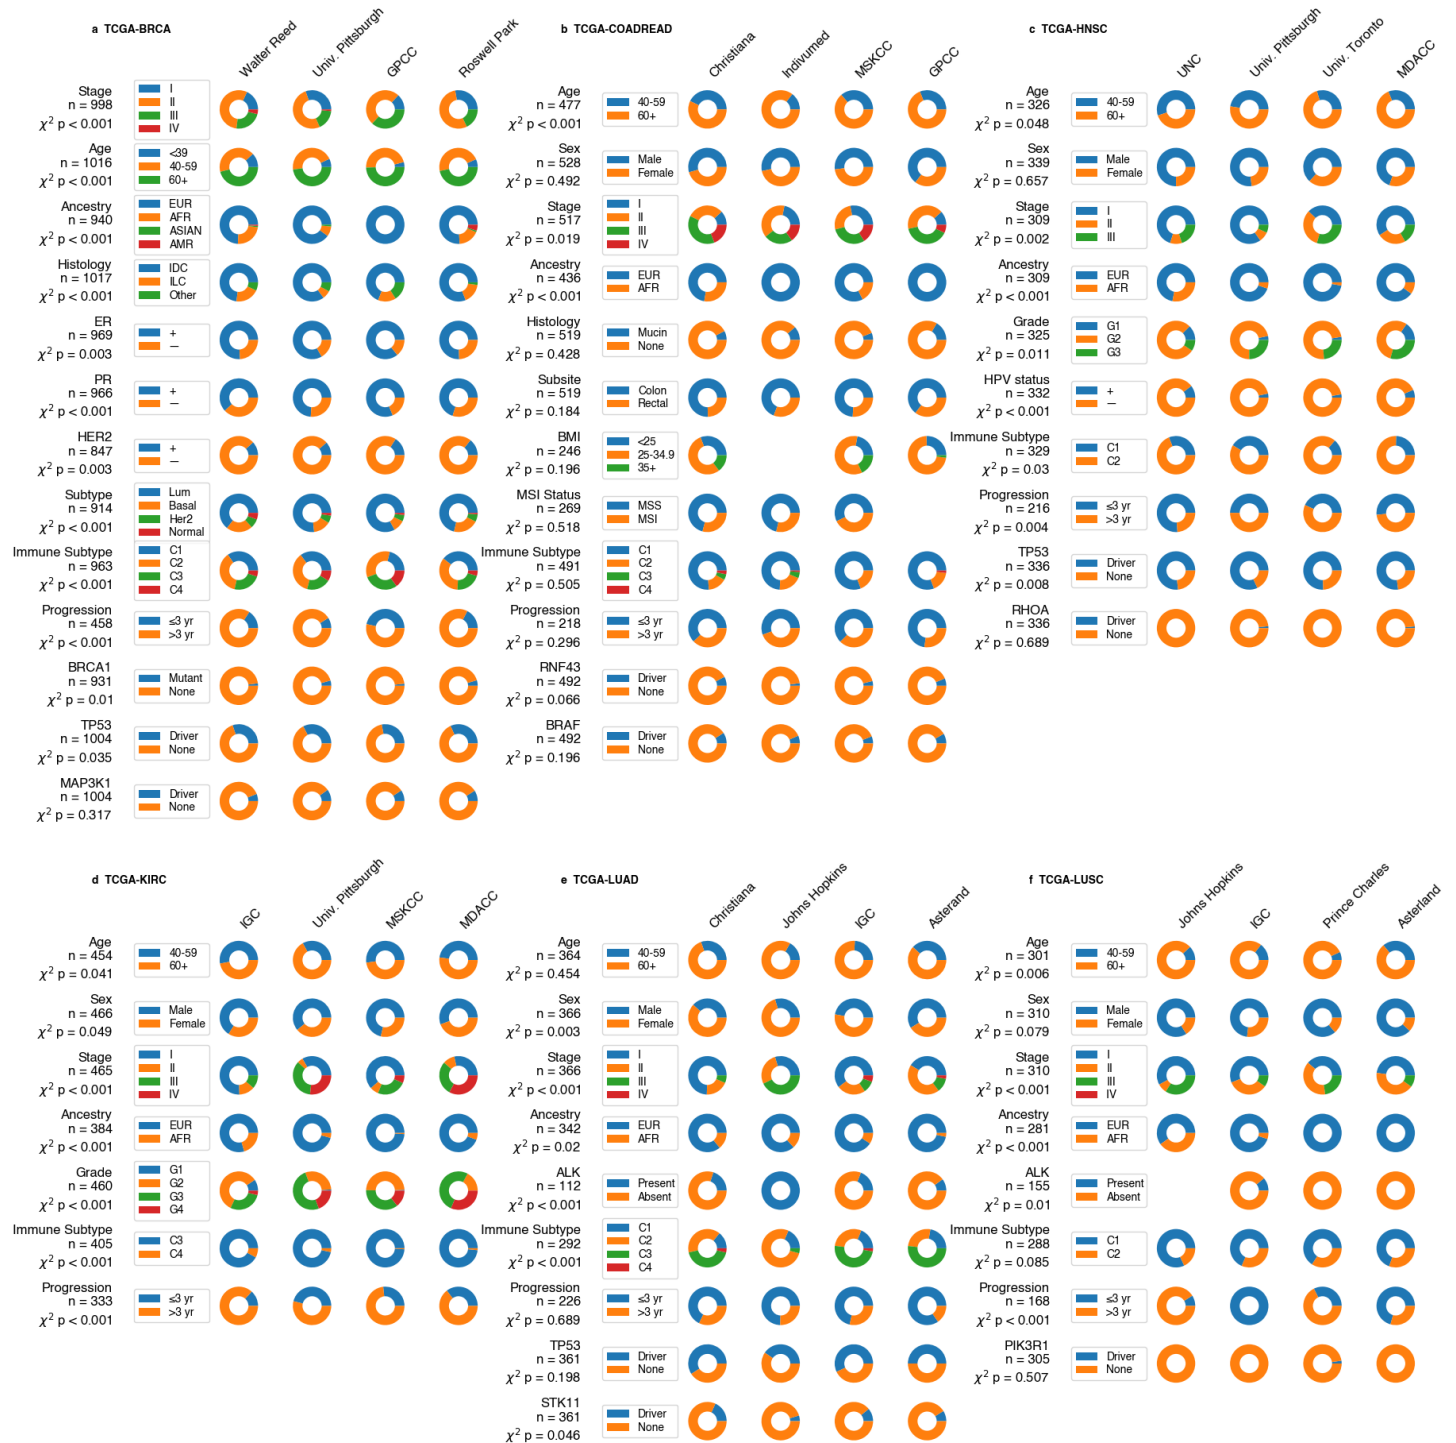

**Supplementary Figure 1. Demographics and Tumor Characteristics of Breast Cancer Variability across TCGA.** Top four

contributing sites are included. Indicated n and  $\chi^2$  values listed are for sites contributing over 20 slides (as per

Supplementary Table 1). **a.** Breast adenocarcinoma. **b.** Colorectal adenocarcinoma. **c.** Head and neck squamous cell carcinoma. **d.** Clear cell renal carcinoma. **e.** Lung adenocarcinoma. **f.** Lung squamous cell carcinoma. Abbreviations:

GPCC = Greater Poland Cancer Center. MSKCC = Memorial Sloan Kettering Cancer Center. UNC = University of North

Carolina. MDACC = MD Anderson Cancer Center. IGC = International Genomic Consortium. EUR = European. AFR = African. AMR = Native American. IDC = Invasive Ductal Carcinoma. ILC = Invasive Lobular Carcinoma. BMI = Body Mass Index. MSI = Microsatellite Instability. MSS = Microsatellite Stable.

**a TCGA-BRCA**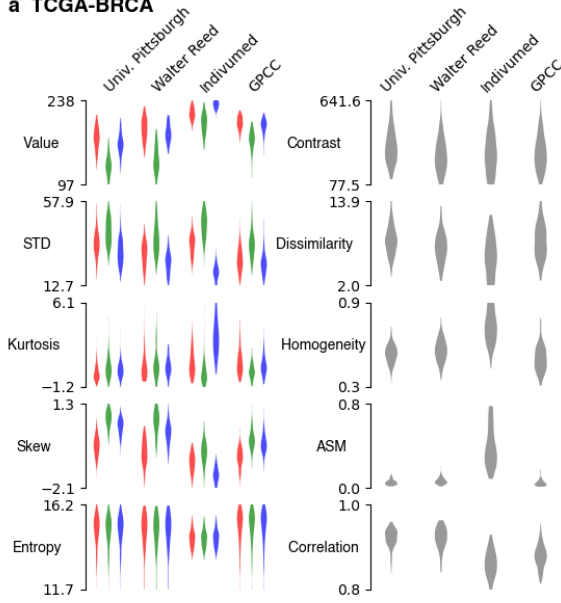**b TCGA-COADREAD**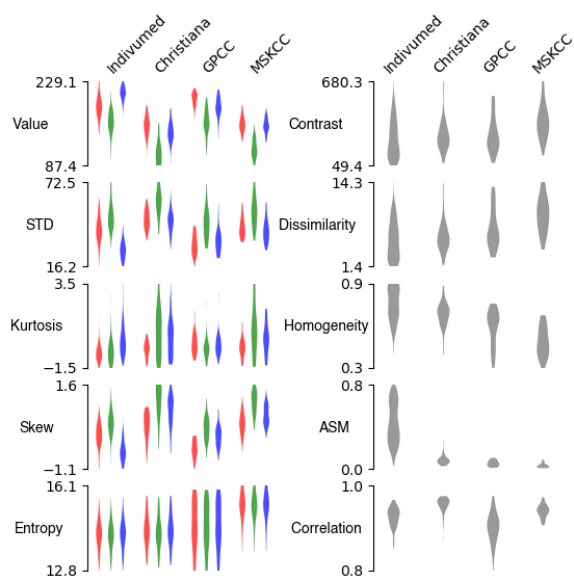**c TCGA-HNSC**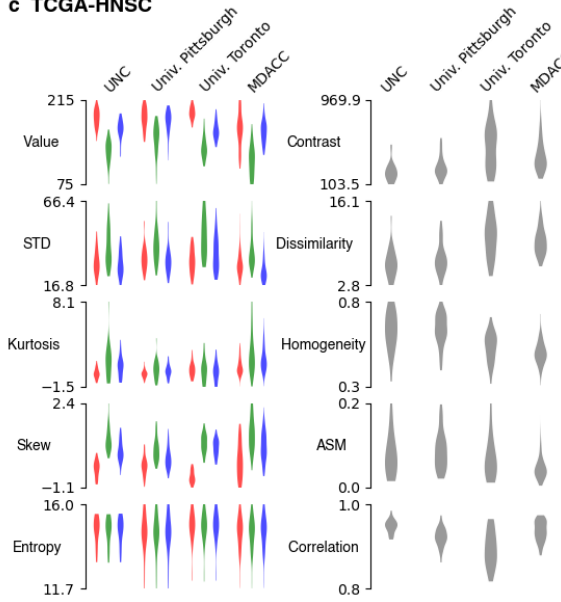**d TCGA-KIRC**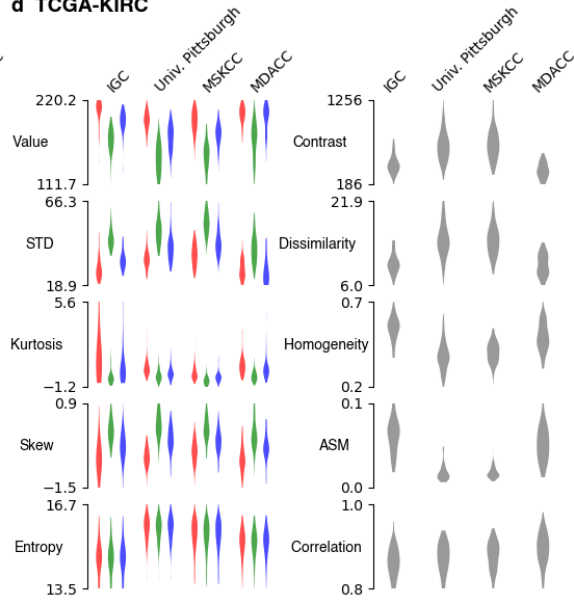**e TCGA-LUAD**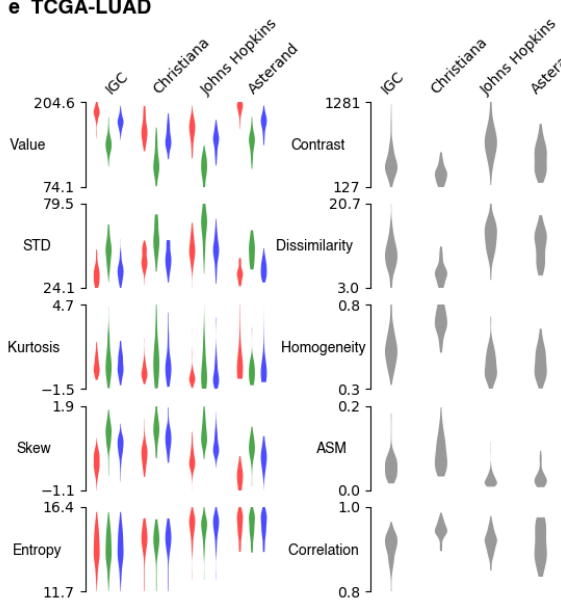**f TCGA-LUSC**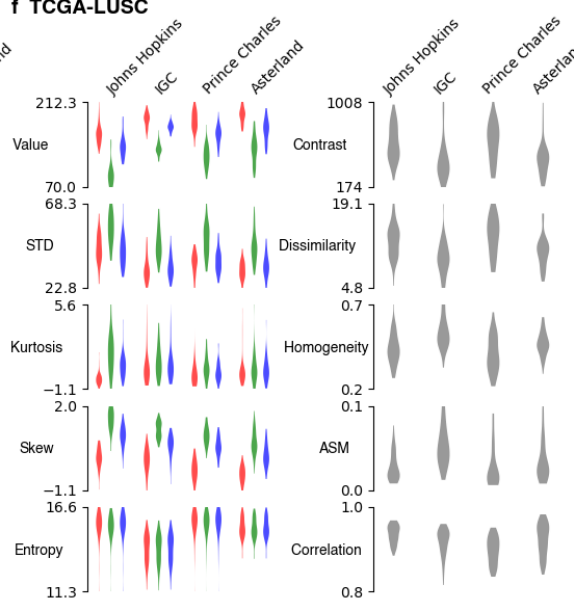

**Supplementary Figure 2. Variance in Digital Histology Image Characteristics in TCGA.** Top four contributing sites are included. First order slide characteristics are featured in color, and second order characteristics featured in grayscale. **a.** Breast adenocarcinoma (n= 432 slides). **b.** Colorectal adenocarcinoma. (n = 389 slides). **c.** Head and neck squamous cell carcinoma. (n = 228 slides). **d.** Clear cell renal carcinoma. (n = 358 slides). **e.** Lung adenocarcinoma. (n = 255 slides). **f.** Lung squamous cell carcinoma. (n = 182 slides). Abbreviations: STD = Standard Deviation. ASM = Angular Second Moment. GPCC = Greater Poland Cancer Center. MSKCC = Memorial Sloan Kettering Cancer Center. UNC = University of North Carolina. MDACC = MD Anderson Cancer Center. IGC = International Genomic Consortium.

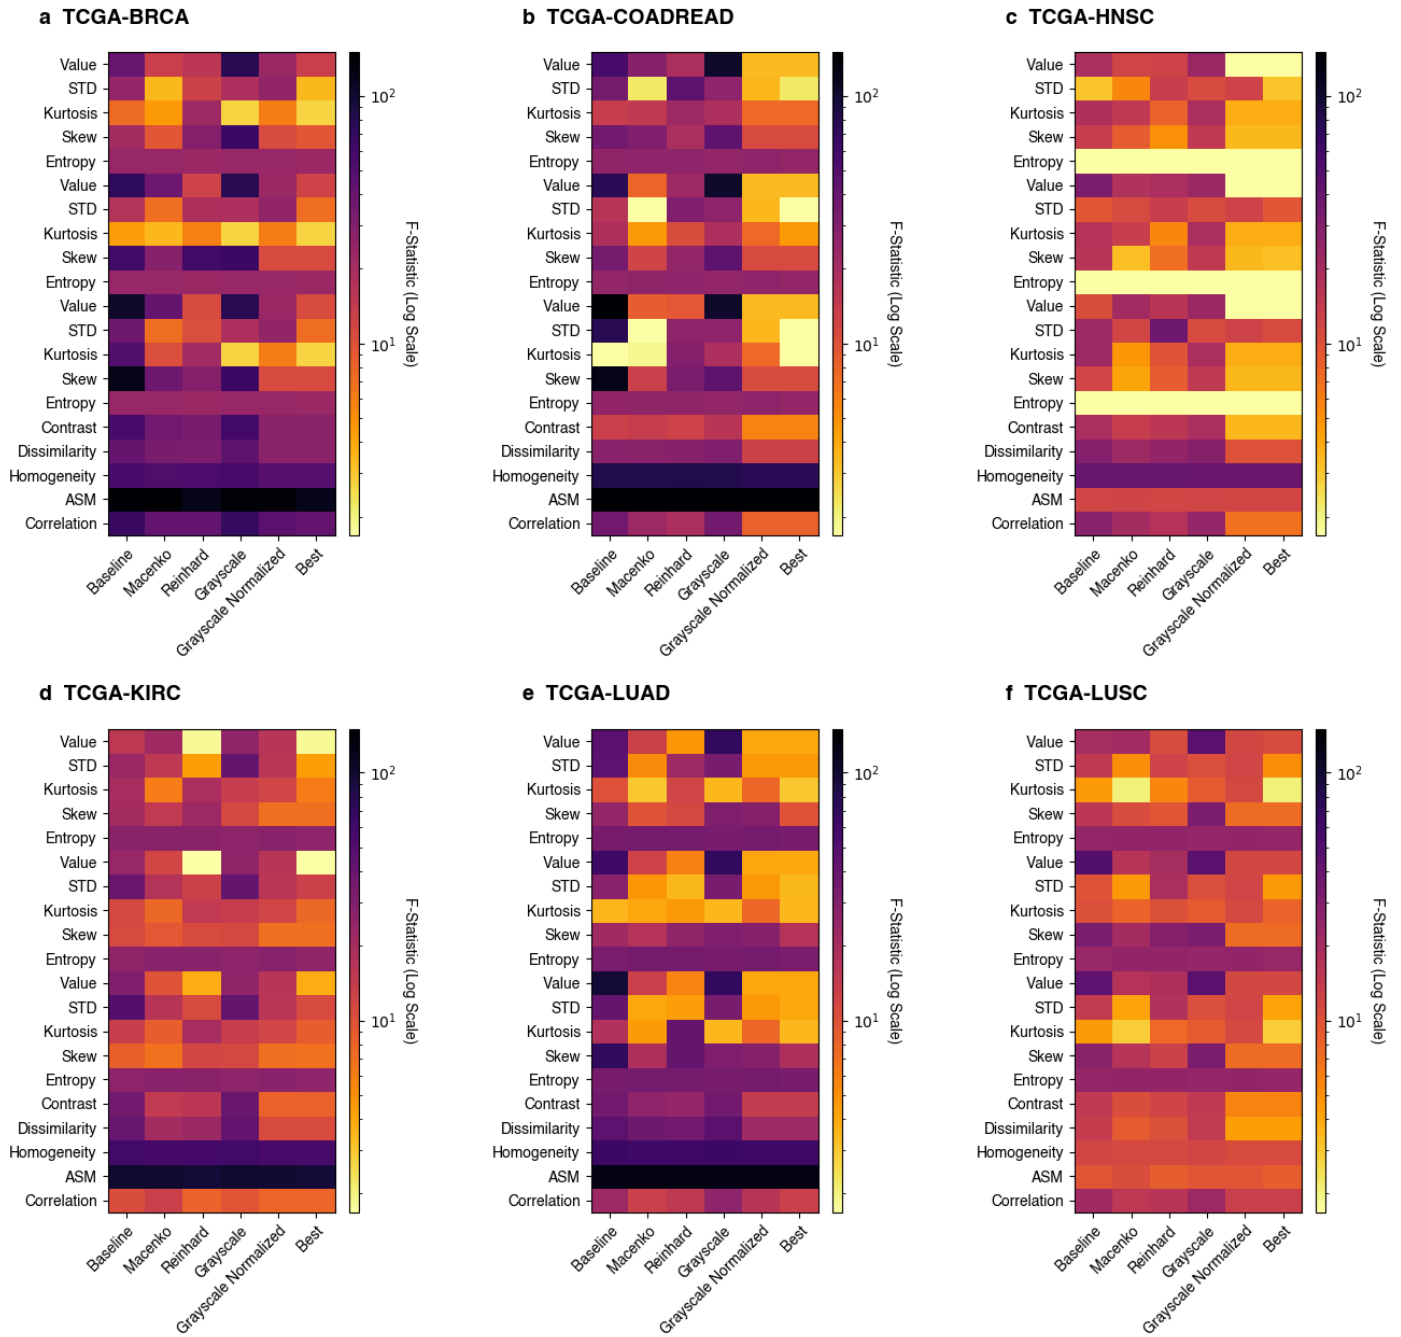

**Supplementary Figure 3. ANOVA F-Statistic for First and Second Order Image Features Across TCGA.** F-statistic is listed for multiple methods of stain normalization, with the lowest F-statistic (least variability) with any method of normalization indicated in the rightmost column. **a.** Breast adenocarcinoma (n = 888 slides). **b.** Colorectal adenocarcinoma. (n = 495 slides). **c.** Head and neck squamous cell carcinoma. (n = 228 slides). **d.** Clear cell renal carcinoma. (n = 456 slides). **e.** Lung adenocarcinoma. (n = 355 slides). **f.** Lung squamous cell carcinoma. (n = 306 slides). Abbreviations: STD = Standard Deviation. ASM = Angular Second Moment.



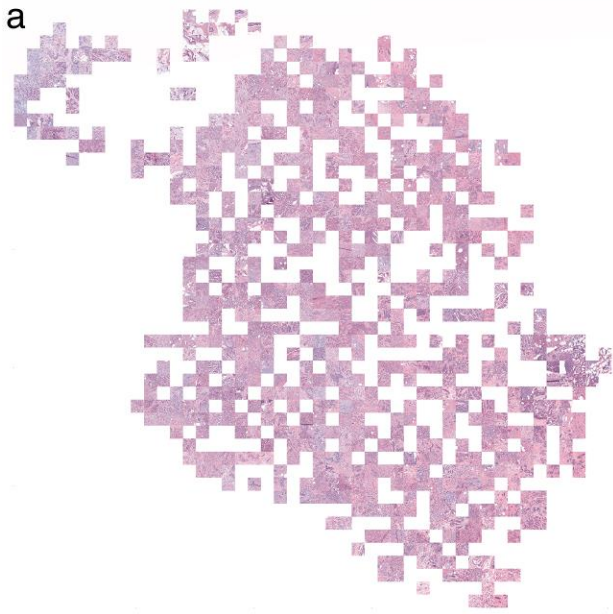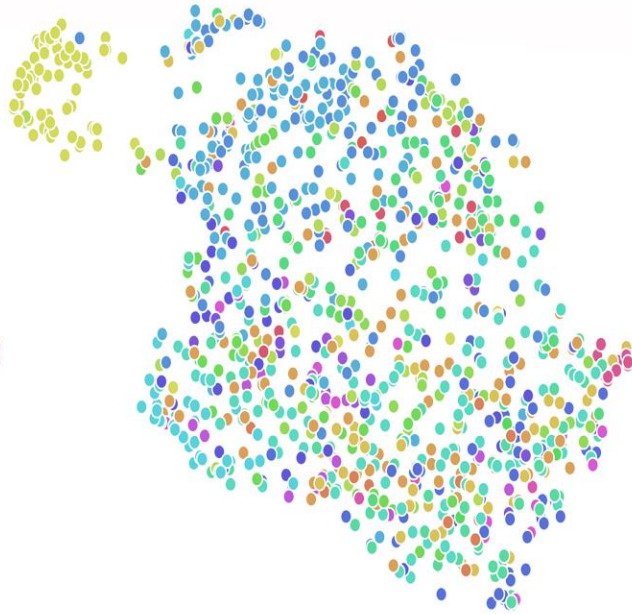

- A2
- C8
- E9
- BH
- D8
- AC
- AR
- A8
- EW
- AN
- LD
- A7
- A1
- GM
- E2
- 3C
- AO
- S3
- OL
- B6
- AQ
- PL
- LL
- PE

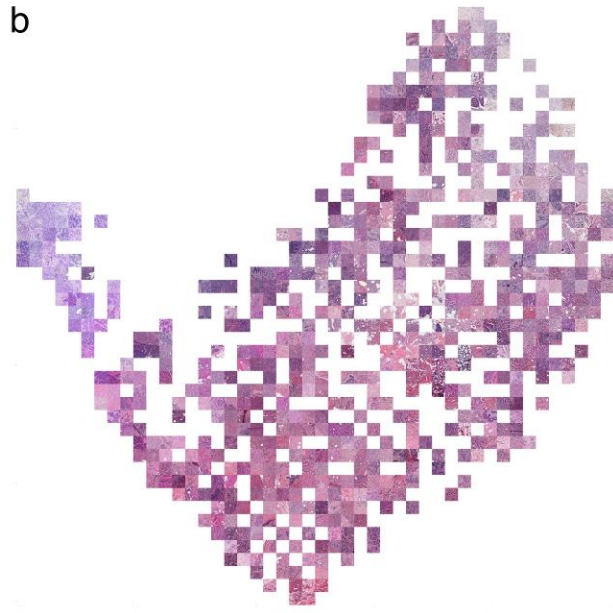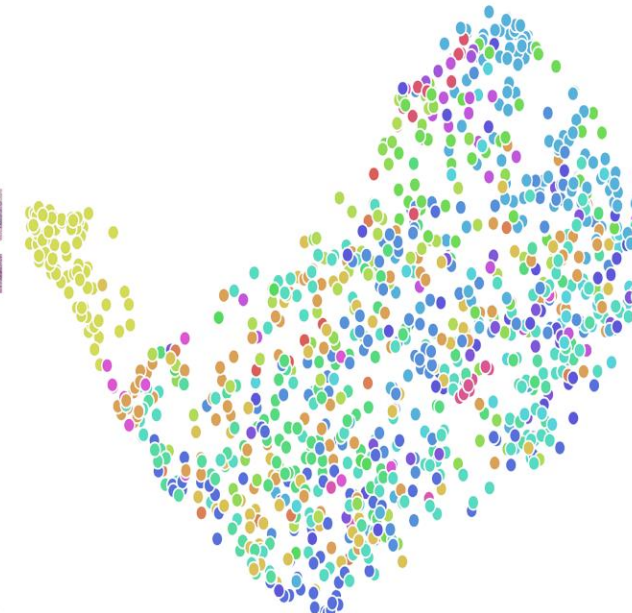

- A7
- D8
- BH
- A8
- B6
- AN
- A2
- E2
- AO
- AC
- E9
- PE
- EW
- C8
- AR
- LL
- A1
- 3C
- GM
- AQ
- LD
- OL
- S3
- PL

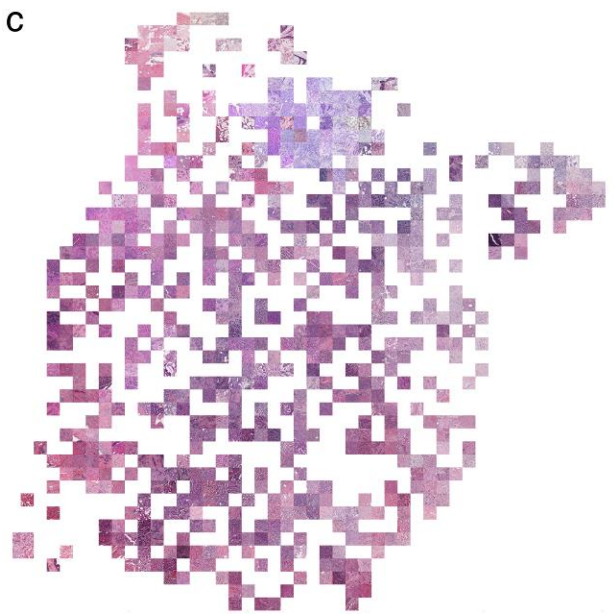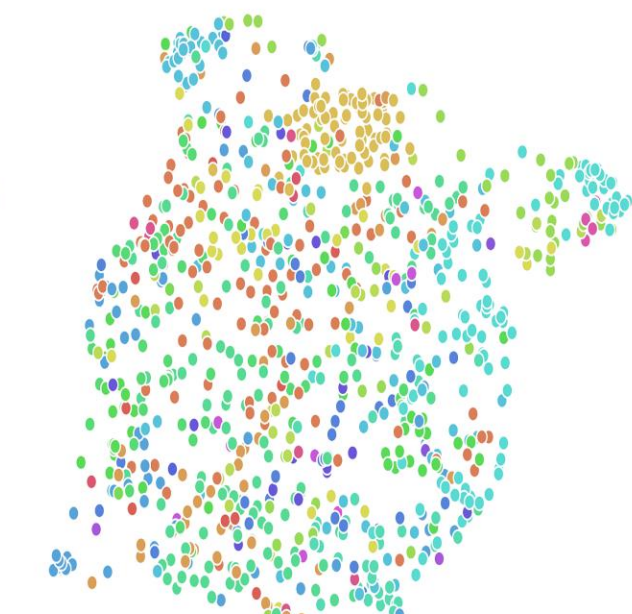

- A7
- A8
- AC
- E2
- D8
- C8
- LL
- AO
- BH
- A2
- B6
- EW
- E9
- AR
- AN
- A1
- GM
- HN
- OK
- AQ
- OL
- JL
- GI
- PE
- LQ

**Supplementary Figure 4. Paired Mosaic and UMAP for Final Layer Activations, Select Models Trained on TCGA-BRCA.**

**a.** Mosaic and UMAP for site detection model, Macenko normalized tiles. **b.** Mosaic and UMAP for ancestry detection, no normalization. **c.** Mosaic and UMAP for BRCA1 detection, no normalization.

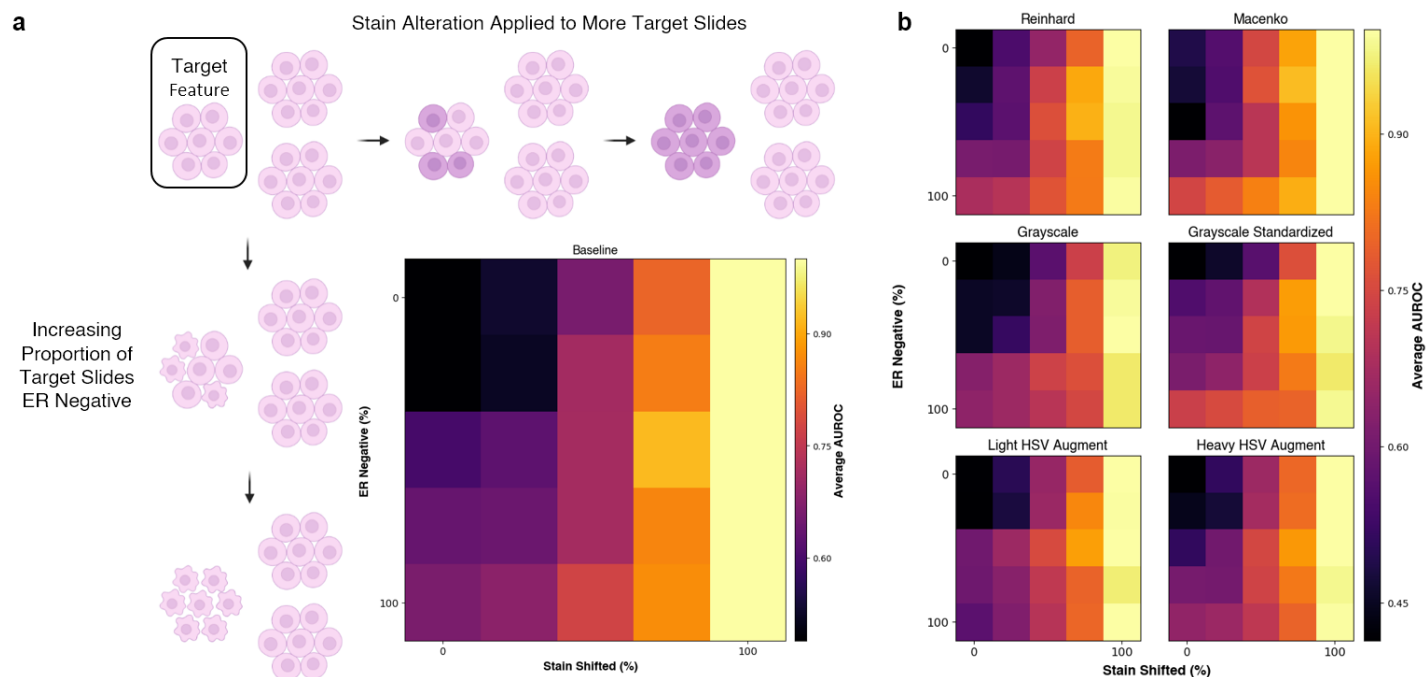

**Supplementary Figure 5. Accuracy in Predicting a Synthetic Feature, as a Function of Biologic / Stain related**

**confounders. a.** A series of experiments were performed, with models trained to identify a synthetic feature of interest from among  $n = 69$  slides. All slides were chosen from University of Pittsburgh, the largest single site contributing to the TCGA Breast Cancer Cohort, to prevent the influence of external batch effect on experiments – and all slides except the feature of interest were taken from ER positive cancers. Biologic and stain related confounders were introduced – the x-axis signifies the percentage of slides in the target feature set which were ER negative, varying from 0 – 100%. Similarly, the y-axis represents the percentage of slides in the target feature set for which an artificial stain artifact was applied. The stain artifact consisted of an up to 5% shift in the hue, saturation and value of a slide. As expected, as the synthetic feature became increasing ER negative, it was more readily distinguished from the background ER positive slides. However, once artificial stain related batch effect was introduced, model accuracy became less dependent on ER positivity. **b.** This relationship held true for all forms of stain normalization and augmentation, with a slight decrease in maximum AUROC, consistent with results seen for site prediction, suggesting that stain related abnormalities are a predominant source of site-specific histologic signatures in TCGA, and are not fully mitigated with normalization / augmentation. Abbreviations: HSV = Hue Saturation Value. AUROC = Area Under the Receive Operating Characteristic Curve.



**Supplementary Table 1. Variance in Demographic and Basic Tumor Characteristics by Site, Select Solid Tumors, The Cancer Genome Atlas.** Limited to sites submitting over 20 samples.

| Dataset    | Variable           | # Samples | # Sites | Degrees of Freedom | Chi-squared statistic   | Corrected p-value         |
|------------|--------------------|-----------|---------|--------------------|-------------------------|---------------------------|
| BRCA       | Stage              | 998       | 15      | 42                 | 99.998                  | $3.21 \times 10^{-6} *$   |
|            | Age                | 1016      | 15      | 28                 | 59.117                  | $8.57 \times 10^{-4} *$   |
|            | Ancestry           | 940       | 15      | 42                 | 1070.007                | $9.17 \times 10^{-196} *$ |
|            | Histology          | 1017      | 15      | 28                 | 128.626                 | $4.92 \times 10^{-14} *$  |
|            | ER                 | 969       | 15      | 14                 | 34.157                  | $2.83 \times 10^{-3} *$   |
|            | PR                 | 966       | 15      | 14                 | 40.047                  | $4.66 \times 10^{-4} *$   |
|            | HER2               | 847       | 15      | 14                 | 33.757                  | $2.91 \times 10^{-3} *$   |
|            | BRCA1              | 931       | 15      | 14                 | 29.561                  | $1.04 \times 10^{-2} *$   |
|            | PAM50 Subtype      | 914       | 15      | 42                 | 111.914                 | $1.24 \times 10^{-7} *$   |
|            | Immune Subtype     | 1002      | 15      | 56                 | 99.836                  | $4.66 \times 10^{-4} *$   |
|            | 3 Year PFS         | 458       | 14      | 13                 | 58.441                  | $3.24 \times 10^{-7} *$   |
|            | TP53               | 1004      | 15      | 14                 | 25.242                  | $3.81 \times 10^{-2} *$   |
| MAP3K1     | 1004               | 15        | 14      | 15.936             | $3.44 \times 10^{-1}$   |                           |
| COAD       | Age                | 477       | 8       | 7                  | 32.326                  | $2.12 \times 10^{-4} *$   |
|            | Sex                | 528       | 8       | 7                  | 7.182                   | $4.92 \times 10^{-1}$     |
|            | Stage              | 517       | 8       | 21                 | 41.665                  | $1.85 \times 10^{-2} *$   |
|            | Ancestry           | 436       | 8       | 7                  | 73.734                  | $3.11 \times 10^{-12} *$  |
|            | Histologic Subtype | 519       | 8       | 7                  | 8.131                   | $4.28 \times 10^{-1}$     |
|            | Subsite            | 519       | 8       | 7                  | 12.821                  | $1.84 \times 10^{-1}$     |
|            | BMI                | 246       | 7       | 12                 | 18.449                  | $1.96 \times 10^{-1}$     |
|            | MSI Status         | 269       | 4       | 3                  | 2.272                   | $5.18 \times 10^{-1}$     |
|            | Immune Subtype     | 491       | 8       | 21                 | 20.937                  | $5.05 \times 10^{-1}$     |
|            | 3 Year PFS         | 218       | 8       | 7                  | 9.845                   | $2.96 \times 10^{-1}$     |
|            | RNF43              | 492       | 8       | 7                  | 16.379                  | $6.56 \times 10^{-2}$     |
|            | BRAF               | 492       | 8       | 7                  | 11.607                  | $1.96 \times 10^{-1}$     |
| HNSC       | Age                | 326       | 7       | 6                  | 13.322                  | $4.78 \times 10^{-2} *$   |
|            | Sex                | 339       | 7       | 6                  | 4.637                   | $6.57 \times 10^{-1}$     |
|            | Stage              | 309       | 7       | 12                 | 34.929                  | $1.60 \times 10^{-3} *$   |
|            | Ancestry           | 309       | 7       | 6                  | 35.71                   | $3.14 \times 10^{-5} *$   |
|            | Grade              | 325       | 7       | 12                 | 27.504                  | $1.09 \times 10^{-2} *$   |
|            | HPV status         | 332       | 7       | 6                  | 33.617                  | $3.99 \times 10^{-5} *$   |
|            | Immune Subtype     | 329       | 7       | 6                  | 14.936                  | $2.97 \times 10^{-2} *$   |
|            | 3 Year PFS         | 216       | 7       | 6                  | 21.117                  | $4.37 \times 10^{-3} *$   |
|            | TP53               | 336       | 7       | 6                  | 19.064                  | $8.11 \times 10^{-3} *$   |
|            | RHOA               | 336       | 7       | 6                  | 3.913                   | $6.89 \times 10^{-1}$     |
| KIRC       | Age                | 454       | 7       | 6                  | 13.516                  | $4.15 \times 10^{-2} *$   |
|            | Sex                | 466       | 7       | 6                  | 12.669                  | $4.86 \times 10^{-2} *$   |
|            | Stage              | 465       | 7       | 18                 | 109.573                 | $2.65 \times 10^{-14} *$  |
|            | Ancestry           | 384       | 7       | 6                  | 67.726                  | $4.18 \times 10^{-12} *$  |
|            | Grade              | 460       | 7       | 18                 | 75.08                   | $1.43 \times 10^{-8} *$   |
|            | Immune Subtype     | 405       | 7       | 6                  | 23.729                  | $9.97 \times 10^{-4} *$   |
| 3 Year PFS | 333                | 7         | 6       | 23.267             | $9.97 \times 10^{-4} *$ |                           |
| LUAD       | Age                | 364       | 8       | 7                  | 7.245                   | $4.54 \times 10^{-1}$     |

|             |                          |     |   |    |        |                          |
|-------------|--------------------------|-----|---|----|--------|--------------------------|
|             | Sex                      | 366 | 8 | 7  | 23.838 | $2.74 \times 10^{-3} *$  |
|             | Stage                    | 366 | 8 | 21 | 89.472 | $1.79 \times 10^{-9} *$  |
|             | Ancestry                 | 342 | 8 | 7  | 18.234 | $1.97 \times 10^{-2} *$  |
|             | ALK Translocation Status | 112 | 7 | 6  | 36.209 | $7.53 \times 10^{-6} *$  |
|             | Immune Subtype           | 292 | 8 | 21 | 80.187 | $3.38 \times 10^{-8} *$  |
|             | 3 Year PFS               | 226 | 8 | 7  | 4.759  | $6.89 \times 10^{-1}$    |
|             | TP53 Driver              | 361 | 8 | 7  | 10.661 | $1.98 \times 10^{-1}$    |
|             | STK11 Driver             | 361 | 8 | 7  | 15.474 | $4.56 \times 10^{-2} *$  |
|             | Age                      | 301 | 8 | 7  | 21.58  | $6.00 \times 10^{-3} *$  |
|             | Sex                      | 310 | 8 | 7  | 13.594 | $7.85 \times 10^{-2}$    |
|             | Stage                    | 310 | 8 | 21 | 56.966 | $9.69 \times 10^{-5} *$  |
|             | Ancestry                 | 281 | 8 | 7  | 83.467 | $2.16 \times 10^{-14} *$ |
| <b>LUSC</b> | ALK Translocation Status | 155 | 6 | 5  | 16.328 | $9.55 \times 10^{-3} *$  |
|             | Immune Subtype           | 288 | 8 | 7  | 12.915 | $8.48 \times 10^{-2}$    |
|             | 3 Year PFS               | 168 | 8 | 7  | 49.82  | $6.27 \times 10^{-8} *$  |
|             | PIK3R1 Driver            | 305 | 8 | 7  | 6.283  | $5.07 \times 10^{-1}$    |

(\*) indicates p-value remained significant even with Benjamini-Hochberg correction for a false discovery rate of 0.05 (calculated per disease type)

**Supplementary Table 2. ANOVA F-Statistic for First and Second Order Image Characteristics, Select Solid Tumors from The Cancer Genome Atlas.** Limited to sites submitting over 20 slides.

| Dataset                                       | Statistic      | Baseline         | Macenko          | Reinhard         | Grayscale     | Grayscale Normalized |
|-----------------------------------------------|----------------|------------------|------------------|------------------|---------------|----------------------|
| <b>BRCA</b><br>n = 888 slides,<br>14 sites    | Red            | 40.4*            | 13.3*            | 15.8*            | 78.6*         | 23.1*                |
|                                               | Red STD        | 24.4*            | 3.5*             | 13.0*            | 18.6*         | 25.3*                |
|                                               | Red Kurtosis   | 7.4*             | 4.7*             | 21.8*            | 2.7*          | 6.1*                 |
|                                               | Red Skew       | 21.0*            | 9.4*             | 29.4*            | 64.8*         | 11.3*                |
|                                               | Red Entropy    | 23.8*            | 23.8*            | 23.7*            | 23.9*         | 23.8*                |
|                                               | Green          | 73.3*            | 37.7*            | 12.5*            | 78.6*         | 23.1*                |
|                                               | Green STD      | 17.4*            | 7.1*             | 18.3*            | 18.6*         | 25.3*                |
|                                               | Green Kurtosis | 4.5*             | 3.5*             | 5.9*             | 2.7*          | 6.1*                 |
|                                               | Green Skew     | 61.6*            | 28.6*            | 60.8*            | 64.8*         | 11.3*                |
|                                               | Green Entropy  | 24.0*            | 23.9*            | 23.8*            | 23.9*         | 23.8*                |
|                                               | Blue           | 105.5*           | 41.7*            | 11.0*            | 78.6*         | 23.1*                |
|                                               | Blue STD       | 37.2*            | 7.3*             | 10.5*            | 18.6*         | 25.3*                |
|                                               | Blue Kurtosis  | 51.1*            | 10.5*            | 21.0*            | 2.7*          | 6.1*                 |
|                                               | Blue Skew      | 123.9*           | 37.3*            | 29.2*            | 64.8*         | 11.3*                |
|                                               | Blue Entropy   | 23.8*            | 23.8*            | 23.7*            | 23.9*         | 23.8*                |
|                                               | Contrast       | 55.9*            | 36.8*            | 33.2*            | 59.5*         | 27.2*                |
|                                               | Dissimilarity  | 41.6*            | 33.3*            | 31.9*            | 44.5*         | 26.9*                |
|                                               | Homogeneity    | 56.8*            | 52.0*            | 54.7*            | 56.8*         | 47.4*                |
|                                               | ASM            | <b>142.5*</b>    | <b>152.2*</b>    | <b>119.5*</b>    | <b>141.6*</b> | <b>141.0*</b>        |
| Correlation                                   | 66.5*          | 43.1*            | 42.4*            | 68.8*            | 46.3*         |                      |
| <b>COADREAD</b><br>n = 495 slides,<br>8 sites | Red            | 57.9*            | 28.4*            | 19.5*            | 104.1*        | 3.4* (p = 0.001)     |
|                                               | Red STD        | 34.9*            | 2.2* (p = 0.031) | 45.3*            | 26.1*         | 3.5* (p = 0.001)     |
|                                               | Red Kurtosis   | 13.9*            | 14.9*            | 22.6*            | 18.9*         | 7.5*                 |
|                                               | Red Skew       | 35.6*            | 30.5*            | 19.2*            | 44.4*         | 11.2*                |
|                                               | Red Entropy    | 25.9*            | 26.0*            | 26.2*            | 25.0*         | 26.1*                |
|                                               | Green          | 76.0*            | 8.0*             | 22.4*            | 104.1*        | 3.4* (p = 0.001)     |
|                                               | Green STD      | 16.9*            | 0.7 (p = 0.664)  | 31.1*            | 26.1*         | 3.5* (p = 0.001)     |
|                                               | Green Kurtosis | 18.3*            | 4.6*             | 10.6*            | 18.9*         | 7.5*                 |
|                                               | Green Skew     | 34.5*            | 12.3*            | 24.7*            | 44.4*         | 11.2*                |
|                                               | Green Entropy  | 24.7*            | 25.9*            | 26.1*            | 25.0*         | 26.1*                |
|                                               | Blue           | 232.7*           | 8.6*             | 9.2*             | 104.1*        | 3.4* (p = 0.001)     |
|                                               | Blue STD       | 77.4*            | 0.9 (p = 0.497)  | 26.7*            | 26.1*         | 3.5* (p = 0.001)     |
|                                               | Blue Kurtosis  | 1.7 (p = 0.098)  | 1.9 (p = 0.07)   | 29.7*            | 18.9*         | 7.5*                 |
|                                               | Blue Skew      | 125.7*           | 13.3*            | 32.5*            | 44.4*         | 11.2*                |
|                                               | Blue Entropy   | 25.1*            | 25.9*            | 25.9*            | 25.0*         | 26.1*                |
|                                               | Contrast       | 13.3*            | 13.9*            | 12.7*            | 16.3*         | 5.8*                 |
|                                               | Dissimilarity  | 28.2*            | 27.7*            | 28.4*            | 31.1*         | 12.9*                |
|                                               | Homogeneity    | 83.4*            | 83.2*            | 86.2*            | 83.3*         | 76.1*                |
|                                               | ASM            | <b>149.8*</b>    | <b>160.5*</b>    | <b>149.8*</b>    | <b>149.3*</b> | <b>149.4*</b>        |
| Correlation                                   | 36.3*          | 22.8*            | 19.2*            | 36.0*            | 8.2*          |                      |
| <b>HNSC</b><br>n = 228 slides,<br>4 sites     | Red            | 19.2*            | 12.1*            | 12.4*            | 23.6*         | 1.2 (p = 0.311)      |
|                                               | Red STD        | 3.1* (p = 0.026) | 5.5* (p = 0.001) | 13.7*            | 11.2*         | 12.6*                |
|                                               | Red Kurtosis   | 18.1*            | 14.8*            | 8.1*             | 19.5*         | 3.9* (p = 0.01)      |
|                                               | Red Skew       | 13.6*            | 8.9*             | 5.0* (p = 0.002) | 15.0*         | 3.5* (p = 0.016)     |

|                                    |                |                 |                  |                  |                 |                  |
|------------------------------------|----------------|-----------------|------------------|------------------|-----------------|------------------|
|                                    | Red Entropy    | 1.6 (p = 0.19)  | 1.6 (p = 0.192)  | 1.6 (p = 0.189)  | 1.5 (p = 0.221) | 1.5 (p = 0.204)  |
|                                    | Green          | 31.6*           | 17.8*            | 19.6*            | 23.6*           | 1.2 (p = 0.311)  |
|                                    | Green STD      | 9.4*            | 11.4*            | 13.7*            | 11.2*           | 12.6*            |
|                                    | Green Kurtosis | 17.3*           | 13.7*            | 5.6* (p = 0.001) | 19.5*           | 3.9* (p = 0.01)  |
|                                    | Green Skew     | 16.6*           | 3.3* (p = 0.021) | 7.1*             | 15.0*           | 3.5* (p = 0.016) |
|                                    | Green Entropy  | 1.4 (p = 0.233) | 1.5 (p = 0.21)   | 1.6 (p = 0.196)  | 1.5 (p = 0.221) | 1.5 (p = 0.204)  |
|                                    | Blue           | 10.7*           | 21.3*            | 16.4*            | 23.6*           | 1.2 (p = 0.311)  |
|                                    | Blue STD       | 21.8*           | 11.9*            | 37.4*            | 11.2*           | 12.6*            |
|                                    | Blue Kurtosis  | 22.5*           | 4.8* (p = 0.003) | 9.7*             | 19.5*           | 3.9* (p = 0.01)  |
|                                    | Blue Skew      | 12.1*           | 4.1* (p = 0.007) | 8.7*             | 15.0*           | 3.5* (p = 0.016) |
|                                    | Blue Entropy   | 1.5 (p = 0.218) | 1.5 (p = 0.204)  | 1.6 (p = 0.195)  | 1.5 (p = 0.221) | 1.5 (p = 0.204)  |
|                                    | Contrast       | 19.0*           | 13.8*            | 15.6*            | 19.1*           | 3.6* (p = 0.015) |
|                                    | Dissimilarity  | 29.4*           | 21.9*            | 25.2*            | 29.2*           | 10.1*            |
|                                    | Homogeneity    | <b>40.3*</b>    | <b>40.6*</b>     | <b>40.7*</b>     | <b>40.1*</b>    | <b>39.9*</b>     |
|                                    | ASM            | 12.0*           | 12.4*            | 11.9*            | 12.0*           | 11.8*            |
|                                    | Correlation    | 28.1*           | 20.7*            | 17.1*            | 24.4*           | 6.9*             |
| LUAD<br>n = 355 slides,<br>8 sites | Red            | 20.1*           | 21.2*            | 10.9*            | <b>46.9*</b>    | 11.7*            |
|                                    | Red STD        | 14.8*           | 5.1*             | 12.5*            | 10.6*           | 12.1*            |
|                                    | Red Kurtosis   | 4.6*            | 2.1* (p = 0.044) | 5.6*             | 8.9*            | 11.4*            |
|                                    | Red Skew       | 15.7*           | 10.9*            | 9.6*             | 32.0*           | 7.5*             |
|                                    | Red Entropy    | 24.9*           | 25.2*            | 25.1*            | 24.5*           | 25.2*            |
|                                    | Green          | <b>51.3*</b>    | 16.8*            | 20.1*            | 46.9*           | 11.7*            |
|                                    | Green STD      | 9.8*            | 4.6*             | 19.5*            | 10.6*           | 12.1*            |
|                                    | Green Kurtosis | 10.3*           | 8.0*             | 10.3*            | 8.9*            | 11.4*            |
|                                    | Green Skew     | 32.8*           | 20.4*            | <b>29.6*</b>     | 32.0*           | 7.5*             |
|                                    | Green Entropy  | 23.8*           | <b>25.3*</b>     | 25.2*            | 24.5*           | 25.2*            |
|                                    | Blue           | 45.6*           | 17.0*            | 18.5*            | 46.9*           | 11.7*            |
|                                    | Blue STD       | 14.3*           | 4.2*             | 17.8*            | 10.6*           | 12.1*            |
|                                    | Blue Kurtosis  | 4.5*            | 2.9* (p = 0.007) | 7.5*             | 8.9*            | 11.4*            |
|                                    | Blue Skew      | 27.5*           | 16.9*            | 12.9*            | 32.0*           | 7.5*             |
|                                    | Blue Entropy   | 24.8*           | 25.2*            | 25.2*            | 24.5*           | <b>25.2*</b>     |
|                                    | Contrast       | 14.9*           | 10.7*            | 12.2*            | 15.0*           | 5.8*             |
|                                    | Dissimilarity  | 14.1*           | 9.0*             | 10.4*            | 14.3*           | 4.4*             |
|                                    | Homogeneity    | 11.9*           | 11.5*            | 11.6*            | 12.0*           | 11.0*            |
|                                    | ASM            | 9.7*            | 10.7*            | 8.5*             | 9.7*            | 9.6*             |
|                                    | Correlation    | 21.5*           | 15.5*            | 16.4*            | 22.8*           | 13.3*            |
| LUSC<br>n = 306 slides,<br>8 sites | Red            | 20.1*           | 21.2*            | 10.9*            | <b>46.9*</b>    | 11.7*            |
|                                    | Red STD        | 14.8*           | 5.1*             | 12.5*            | 10.6*           | 12.1*            |
|                                    | Red Kurtosis   | 4.6*            | 2.1* (p = 0.044) | 5.6*             | 8.9*            | 11.4*            |
|                                    | Red Skew       | 15.7*           | 10.9*            | 9.6*             | 32.0*           | 7.5*             |
|                                    | Red Entropy    | 24.9*           | 25.2*            | 25.1*            | 24.5*           | <b>25.2*</b>     |
|                                    | Green          | 51.3*           | 16.8*            | 20.1*            | <b>46.9*</b>    | 11.7*            |
|                                    | Green STD      | 9.8*            | 4.6*             | 19.5*            | 10.6*           | 12.1*            |
|                                    | Green Kurtosis | 10.3*           | 8.0*             | 10.3*            | 8.9*            | 11.4*            |
|                                    | Green Skew     | 32.8*           | 20.4*            | <b>29.6*</b>     | 32.0*           | 7.5*             |
|                                    | Green Entropy  | 23.8*           | <b>25.3*</b>     | 25.2*            | 24.5*           | <b>25.2*</b>     |
|                                    | Blue           | <b>45.6*</b>    | 17.0*            | 18.5*            | <b>46.9*</b>    | 11.7*            |
|                                    | Blue STD       | 14.3*           | 4.2*             | 17.8*            | 10.6*           | 12.1*            |
|                                    | Blue Kurtosis  | 4.5*            | 2.9* (p = 0.007) | 7.5*             | 8.9*            | 11.4*            |

|  |                |               |               |                 |               |               |
|--|----------------|---------------|---------------|-----------------|---------------|---------------|
|  | Blue Skew      | 27.5*         | 16.9*         | 12.9*           | 32.0*         | 7.5*          |
|  | Blue Entropy   | 24.8*         | 25.2*         | 25.2*           | 24.5*         | 25.2*         |
|  | Contrast       | 14.9*         | 10.7*         | 12.2*           | 15.0*         | 5.8*          |
|  | Dissimilarity  | 14.1*         | 9.0*          | 10.4*           | 14.3*         | 4.4*          |
|  | Homogeneity    | 11.9*         | 11.5*         | 11.6*           | 12.0*         | 11.0*         |
|  | ASM            | 9.7*          | 10.7*         | 8.5*            | 9.7*          | 9.6*          |
|  | Correlation    | 21.5*         | 15.5*         | 16.4*           | 22.8*         | 13.3*         |
|  | Red            | 15.5*         | 21.5*         | 1.8 (p = 0.096) | 25.5*         | 16.6*         |
|  | Red STD        | 23.6*         | 15.4*         | 4.4*            | 42.1*         | 16.0*         |
|  | Red Kurtosis   | 19.6*         | 6.2*          | 19.4*           | 13.8*         | 12.0*         |
|  | Red Skew       | 20.3*         | 14.7*         | 22.3*           | 11.4*         | 7.0*          |
|  | Red Entropy    | 27.3*         | 27.8*         | 27.8*           | 26.3*         | 28.0*         |
|  | Green          | 24.0*         | 11.8*         | 1.6 (p = 0.142) | 25.5*         | 16.6*         |
|  | Green STD      | 39.1*         | 17.5*         | 12.9*           | 42.1*         | 16.0*         |
|  | Green Kurtosis | 11.4*         | 7.7*          | 14.7*           | 13.8*         | 12.0*         |
|  | Green Skew     | 11.3*         | 9.3*          | 11.2*           | 11.4*         | 7.0*          |
|  | Green Entropy  | 25.5*         | 28.1*         | 27.9*           | 26.3*         | 28.0*         |
|  | Blue           | 30.7*         | 9.7*          | 3.9*            | 25.5*         | 16.6*         |
|  | Blue STD       | 49.8*         | 16.9*         | 11.2*           | 42.1*         | 16.0*         |
|  | Blue Kurtosis  | 13.6*         | 8.5*          | 19.7*           | 13.8*         | 12.0*         |
|  | Blue Skew      | 8.4*          | 6.8*          | 11.8*           | 11.4*         | 7.0*          |
|  | Blue Entropy   | 26.6*         | 27.9*         | 27.8*           | 26.3*         | 28.0*         |
|  | Contrast       | 36.1*         | 14.6*         | 15.9*           | 39.1*         | 8.3*          |
|  | Dissimilarity  | 40.8*         | 20.9*         | 23.5*           | 42.6*         | 11.1*         |
|  | Homogeneity    | 61.7*         | 59.0*         | 59.2*           | 61.8*         | 57.1*         |
|  | ASM            | <b>102.2*</b> | <b>102.5*</b> | <b>96.7*</b>    | <b>102.1*</b> | <b>101.2*</b> |
|  | Correlation    | 10.7*         | 13.2*         | 8.0*            | 9.6*          | 7.9*          |

**KIRC**  
n = 456 slides,  
7 sites

(\*) indicates p-value remained significant even with Benjamini-Hochberg correction for a false discovery rate of 0.05 (calculated per disease type, per stain normalization method). Factor with highest associated F-statistic indicated in bold. Degrees of freedom for each ANOVA test is number of sites listed – 1. Exact p-values listed for tests with p-value > 0.001. Additional p-values and corrected p-values available in source data.

**Supplementary Table 3. One-Versus-Rest Area under the Receiver Operating Characteristic Curve (AUROC) for**

**Prediction of Tissue Submitting Site, with 3-Fold Cross Validation.** The first p-value (compared to baseline) indicating a two sided paired t-test between the AUROCs generated by the listed method of stain normalization / augmentation, and the values obtained without stain normalization / augmentation. The second p-value (compared to 0.500) indicates a one sided t-test comparing the AUROCs generated by the listed method to stain normalization / augmentation to random chance (AUROC 0.500). The p-values are Benjamini-Hochberg corrected for a false discovery rate of 0.05

| Dataset                                        | Slide Adjustment Method | Average AUROC (Range) | p-value (Compared to Baseline) | p-value (Compared to 0.500) |
|------------------------------------------------|-------------------------|-----------------------|--------------------------------|-----------------------------|
| <b>BRCA</b><br>n = 1032<br>slides, 39 sites    | Baseline                | 0.987 (0.968 - 0.998) | ---                            | $1.21 \times 10^{-46} *$    |
|                                                | Macenko                 | 0.966 (0.950 - 0.983) | $6.36 \times 10^{-12} *$       | $1.70 \times 10^{-47} *$    |
|                                                | Reinhard                | 0.984 (0.962 - 0.992) | $1.01 \times 10^{-1}$          | $5.57 \times 10^{-51} *$    |
|                                                | Grayscale               | 0.950 (0.925 - 0.966) | $2.79 \times 10^{-20} *$       | $1.21 \times 10^{-46} *$    |
|                                                | Grayscale Normalized    | 0.958 (0.932 - 0.973) | $8.19 \times 10^{-15} *$       | $1.45 \times 10^{-44} *$    |
|                                                | Light HSV Augmentation  | 0.973 (0.956 - 0.985) | $7.53 \times 10^{-9} *$        | $7.89 \times 10^{-51} *$    |
|                                                | Heavy HSV Augmentation  | 0.965 (0.947 - 0.976) | $1.65 \times 10^{-13} *$       | $2.20 \times 10^{-49} *$    |
| <b>COADREAD</b><br>n = 579 slides,<br>23 sites | Baseline                | 0.986 (0.971 - 0.997) | ---                            | $1.87 \times 10^{-49} *$    |
|                                                | Macenko                 | 0.975 (0.948 - 0.990) | $8.29 \times 10^{-5} *$        | $3.88 \times 10^{-45} *$    |
|                                                | Reinhard                | 0.973 (0.933 - 0.992) | $8.00 \times 10^{-4} *$        | $1.86 \times 10^{-39} *$    |
|                                                | Grayscale               | 0.962 (0.917 - 0.983) | $1.50 \times 10^{-9} *$        | $1.08 \times 10^{-40} *$    |
|                                                | Grayscale Normalized    | 0.956 (0.890 - 0.982) | $5.17 \times 10^{-7} *$        | $7.06 \times 10^{-35} *$    |
|                                                | Light HSV Augmentation  | 0.968 (0.935 - 0.986) | $1.12 \times 10^{-7} *$        | $1.60 \times 10^{-42} *$    |
|                                                | Heavy HSV Augmentation  | 0.967 (0.922 - 0.990) | $1.09 \times 10^{-6} *$        | $4.56 \times 10^{-40} *$    |
| <b>HNSC</b><br>n = 431 slides,<br>26 sites     | Baseline                | 0.965 (0.899 - 0.992) | ---                            | $4.01 \times 10^{-33} *$    |
|                                                | Macenko                 | 0.935 (0.905 - 0.965) | $3.07 \times 10^{-5} *$        | $6.55 \times 10^{-41} *$    |
|                                                | Reinhard                | 0.915 (0.867 - 0.962) | $8.87 \times 10^{-9} *$        | $1.16 \times 10^{-35} *$    |
|                                                | Grayscale               | 0.853 (0.786 - 0.920) | $9.04 \times 10^{-16} *$       | $4.48 \times 10^{-27} *$    |
|                                                | Grayscale Normalized    | 0.870 (0.818 - 0.906) | $9.93 \times 10^{-17} *$       | $1.93 \times 10^{-32} *$    |
|                                                | Light HSV Augmentation  | 0.920 (0.836 - 0.974) | $2.48 \times 10^{-5} *$        | $6.28 \times 10^{-29} *$    |
|                                                | Heavy HSV Augmentation  | 0.901 (0.807 - 0.961) | $2.71 \times 10^{-8} *$        | $2.41 \times 10^{-28} *$    |
| <b>LUAD</b><br>n = 458 slides,<br>33 sites     | Baseline                | 0.967 (0.917 - 0.993) | ---                            | $4.68 \times 10^{-34} *$    |
|                                                | Macenko                 | 0.955 (0.916 - 0.984) | $1.01 \times 10^{-1}$          | $5.78 \times 10^{-34} *$    |
|                                                | Reinhard                | 0.957 (0.922 - 0.980) | $1.49 \times 10^{-1}$          | $1.65 \times 10^{-34} *$    |
|                                                | Grayscale               | 0.895 (0.832 - 0.939) | $1.83 \times 10^{-11} *$       | $4.70 \times 10^{-28} *$    |
|                                                | Grayscale Normalized    | 0.952 (0.901 - 0.996) | $1.01 \times 10^{-1}$          | $4.70 \times 10^{-28} *$    |
|                                                | Light HSV Augmentation  | 0.939 (0.915 - 0.968) | $8.41 \times 10^{-5} *$        | $1.73 \times 10^{-34} *$    |
|                                                | Heavy HSV Augmentation  | 0.925 (0.891 - 0.965) | $8.22 \times 10^{-7} *$        | $3.43 \times 10^{-31} *$    |
| <b>LUSC</b><br>n = 463 slides,<br>35 sites     | Baseline                | 0.964 (0.905 - 0.994) | ---                            | $1.31 \times 10^{-33} *$    |
|                                                | Macenko                 | 0.950 (0.913 - 0.976) | $5.11 \times 10^{-2}$          | $3.36 \times 10^{-38} *$    |
|                                                | Reinhard                | 0.957 (0.925 - 0.978) | $3.22 \times 10^{-1}$          | $4.56 \times 10^{-40} *$    |
|                                                | Grayscale               | 0.925 (0.890 - 0.963) | $1.46 \times 10^{-7} *$        | $1.74 \times 10^{-38} *$    |
|                                                | Grayscale Normalized    | 0.931 (0.906 - 0.957) | $2.13 \times 10^{-6} *$        | $2.27 \times 10^{-41} *$    |
|                                                | Light HSV Augmentation  | 0.934 (0.876 - 0.975) | $2.80 \times 10^{-4} *$        | $4.84 \times 10^{-33} *$    |
|                                                | Heavy HSV Augmentation  | 0.935 (0.901 - 0.965) | $3.10 \times 10^{-5} *$        | $2.23 \times 10^{-39} *$    |



|                                            |                        |                       |                          |                          |
|--------------------------------------------|------------------------|-----------------------|--------------------------|--------------------------|
| <b>KIRC</b><br>n = 505 slides,<br>17 sites | Baseline               | 0.998 (0.995 - 1.000) | ---                      | $7.85 \times 10^{-70} *$ |
|                                            | Macenko                | 0.992 (0.981 - 0.999) | $1.95 \times 10^{-10} *$ | $1.04 \times 10^{-56} *$ |
|                                            | Reinhard               | 0.992 (0.982 - 0.997) | $8.44 \times 10^{-10} *$ | $5.16 \times 10^{-56} *$ |
|                                            | Grayscale              | 0.925 (0.854 - 0.967) | $4.62 \times 10^{-16} *$ | $1.05 \times 10^{-31} *$ |
|                                            | Grayscale Normalized   | 0.998 (0.993 - 1.000) | $8.85 \times 10^{-1}$    | $5.52 \times 10^{-64} *$ |
|                                            | Light HSV Augmentation | 0.973 (0.954 - 0.987) | $5.48 \times 10^{-19} *$ | $1.20 \times 10^{-46} *$ |
|                                            | Heavy HSV Augmentation | 0.960 (0.928 - 0.988) | $1.22 \times 10^{-17} *$ | $1.08 \times 10^{-40} *$ |

P-values listed are Benjamini-Hochberg corrected for a false discovery rate of 0.05, with (\*) indicating p-values maintain significance with correction.

**Supplementary Table 4. Prediction of Tissue Submitting Site Using Demographic, Clinical, and Genomic Features.**

| <b>Dataset</b> | <b># Sites</b> | <b>Average AUROC, 3-Fold Cross Validation</b> |
|----------------|----------------|-----------------------------------------------|
| BRCA           | 15             | 0.642                                         |
| COADREAD       | 15             | 0.781                                         |
| HNSC           | 19             | 0.613                                         |
| KIRC           | 12             | 0.600                                         |
| LUAD           | 26             | 0.591                                         |
| LUSC           | 27             | 0.511                                         |

**Supplementary Table 5. Accuracy in Predicting a Synthetic Feature, as a Function of Biologic / Stain related Confounders.**

| Normalization        | ER Negative Slides | Stain Altered Slides |       |       |       |       |
|----------------------|--------------------|----------------------|-------|-------|-------|-------|
|                      |                    | 0                    | 5     | 11    | 17    | 23    |
| Baseline             | 0                  | 0.49                 | 0.532 | 0.659 | 0.822 | 1.000 |
|                      | 5                  | 0.488                | 0.521 | 0.714 | 0.854 | 1.000 |
|                      | 11                 | 0.597                | 0.625 | 0.715 | 0.919 | 1.000 |
|                      | 17                 | 0.638                | 0.644 | 0.715 | 0.863 | 1.000 |
|                      | 23                 | 0.664                | 0.684 | 0.774 | 0.871 | 1.000 |
| Reinhard             | 0                  | 0.454                | 0.578 | 0.673 | 0.810 | 1.000 |
|                      | 5                  | 0.501                | 0.602 | 0.753 | 0.893 | 0.992 |
|                      | 11                 | 0.547                | 0.599 | 0.779 | 0.903 | 0.987 |
|                      | 17                 | 0.636                | 0.634 | 0.755 | 0.842 | 0.985 |
|                      | 23                 | 0.705                | 0.720 | 0.786 | 0.839 | 0.997 |
| Macenko              | 0                  | 0.489                | 0.558 | 0.748 | 0.881 | 1.000 |
|                      | 5                  | 0.473                | 0.553 | 0.769 | 0.910 | 1.000 |
|                      | 11                 | 0.416                | 0.573 | 0.707 | 0.863 | 1.000 |
|                      | 17                 | 0.617                | 0.636 | 0.706 | 0.844 | 1.000 |
|                      | 23                 | 0.746                | 0.784 | 0.837 | 0.893 | 1.000 |
| Grayscale            | 0                  | 0.406                | 0.430 | 0.553 | 0.711 | 0.946 |
|                      | 5                  | 0.443                | 0.449 | 0.607 | 0.764 | 0.959 |
|                      | 11                 | 0.443                | 0.506 | 0.601 | 0.764 | 0.968 |
|                      | 17                 | 0.610                | 0.645 | 0.714 | 0.740 | 0.934 |
|                      | 23                 | 0.624                | 0.645 | 0.683 | 0.725 | 0.934 |
| Grayscale Normalized | 0                  | 0.412                | 0.455 | 0.560 | 0.755 | 0.988 |
|                      | 5                  | 0.547                | 0.572 | 0.685 | 0.863 | 0.988 |
|                      | 11                 | 0.585                | 0.581 | 0.732 | 0.858 | 0.971 |
|                      | 17                 | 0.609                | 0.637 | 0.726 | 0.819 | 0.953 |
|                      | 23                 | 0.725                | 0.747 | 0.783 | 0.788 | 0.976 |
| Augment              | 0                  | 0.395                | 0.481 | 0.639 | 0.775 | 0.997 |
|                      | 5                  | 0.391                | 0.459 | 0.643 | 0.837 | 0.994 |
|                      | 11                 | 0.582                | 0.649 | 0.743 | 0.868 | 0.997 |
|                      | 17                 | 0.578                | 0.617 | 0.702 | 0.786 | 0.965 |
|                      | 23                 | 0.552                | 0.604 | 0.685 | 0.789 | 0.997 |
| Augment Heavy        | 0                  | 0.414                | 0.511 | 0.661 | 0.801 | 1.000 |
|                      | 5                  | 0.445                | 0.471 | 0.674 | 0.808 | 1.000 |
|                      | 11                 | 0.511                | 0.601 | 0.747 | 0.865 | 1.000 |
|                      | 17                 | 0.606                | 0.606 | 0.739 | 0.826 | 0.985 |
|                      | 23                 | 0.646                | 0.660 | 0.712 | 0.796 | 0.997 |

**Supplementary Table 6. Distribution of Patients Across Validation Folds with Standard and Preserved Site Cross Validation.**

| Dataset            | Feature            | # Slides | # Slides Excluded | Subgroup  | Standard Cross Validation |     |     | Preserved Site Cross Validation |     |     |
|--------------------|--------------------|----------|-------------------|-----------|---------------------------|-----|-----|---------------------------------|-----|-----|
|                    |                    |          |                   |           | CV1                       | CV2 | CV3 | CV1                             | CV2 | CV3 |
| BRCA               | Age                | 1062     | 9                 | <39       | 25                        | 25  | 25  | 25                              | 25  | 25  |
|                    |                    |          |                   | 40-59     | 163                       | 162 | 162 | 163                             | 163 | 162 |
|                    |                    |          |                   | 60+       | 167                       | 166 | 166 | 166                             | 166 | 167 |
|                    | Stage              | 1044     | 8                 | Stage I   | 59                        | 59  | 58  | 58                              | 59  | 59  |
|                    |                    |          |                   | Stage II  | 203                       | 203 | 202 | 203                             | 202 | 203 |
|                    |                    |          |                   | Stage III | 81                        | 80  | 80  | 80                              | 80  | 81  |
|                    |                    |          |                   | Stage IV  | 7                         | 6   | 6   | 7                               | 6   | 6   |
|                    | ER Status          | 1011     | 8                 | Positive  | 261                       | 261 | 261 | 261                             | 261 | 261 |
|                    |                    |          |                   | Negative  | 76                        | 76  | 76  | 76                              | 76  | 76  |
|                    | PR Status          | 1008     | 8                 | Positive  | 225                       | 225 | 224 | 225                             | 225 | 224 |
|                    |                    |          |                   | Negative  | 112                       | 111 | 111 | 111                             | 112 | 111 |
|                    | HER2 Status        | 856      | 2                 | Positive  | 50                        | 50  | 50  | 50                              | 50  | 50  |
|                    |                    |          |                   | Negative  | 236                       | 235 | 235 | 236                             | 235 | 235 |
|                    | PAM50 Subtype      | 950      | 10                | Luminal   | 225                       | 224 | 224 | 224                             | 224 | 225 |
|                    |                    |          |                   | Basal     | 56                        | 56  | 55  | 56                              | 55  | 56  |
|                    |                    |          |                   | HER2      | 26                        | 25  | 25  | 27                              | 24  | 25  |
|                    |                    |          |                   | Normal    | 12                        | 11  | 11  | 11                              | 12  | 11  |
|                    | Histologic Subtype | 948      | 8                 | IDC       | 253                       | 252 | 252 | 253                             | 252 | 252 |
|                    |                    |          |                   | ILC       | 64                        | 64  | 63  | 63                              | 64  | 64  |
|                    | Ancestry           | 913      | 8                 | African   | 54                        | 54  | 54  | 54                              | 54  | 54  |
| European           |                    |          |                   | 251       | 250                       | 250 | 250 | 251                             | 250 |     |
| PFS                | 489                | 2        | ≤3 years          | 29        | 29                        | 28  | 29  | 29                              | 28  |     |
|                    |                    |          | >3 years          | 135       | 134                       | 134 | 134 | 135                             | 134 |     |
| TP53               | 1048               | 8        | Driver            | 113       | 113                       | 112 | 113 | 112                             | 113 |     |
|                    |                    |          | No Driver         | 237       | 237                       | 236 | 237 | 236                             | 237 |     |
| MAP3K1             | 1048               | 8        | Driver            | 23        | 22                        | 22  | 22  | 23                              | 22  |     |
|                    |                    |          | No Driver         | 327       | 327                       | 327 | 327 | 327                             | 327 |     |
| BRCA1              | 931                | 8        | Mutation          | 11        | 10                        | 10  | 11  | 10                              | 10  |     |
|                    |                    |          | No Mutation       | 300       | 300                       | 300 | 300 | 300                             | 300 |     |
| Immune Subtype     | 1007               | 8        | C1                | 118       | 117                       | 117 | 117 | 117                             | 118 |     |
|                    |                    |          | C2                | 128       | 127                       | 127 | 127 | 127                             | 128 |     |
|                    |                    |          | C3                | 62        | 62                        | 61  | 62  | 61                              | 62  |     |
|                    |                    |          | C4                | 30        | 29                        | 29  | 29  | 30                              | 29  |     |
| Age                | 562                | 21       | 40-59             | 50        | 50                        | 50  | 36  | 57                              | 57  |     |
|                    |                    |          | 60+               | 138       | 137                       | 137 | 192 | 110                             | 110 |     |
| Stage              | 594                | 26       | Stage I           | 36        | 36                        | 35  | 55  | 26                              | 26  |     |
|                    |                    |          | Stage II          | 75        | 75                        | 74  | 98  | 63                              | 63  |     |
|                    |                    |          | Stage III         | 59        | 59                        | 58  | 61  | 57                              | 58  |     |
|                    |                    |          | Stage IV          | 29        | 29                        | 29  | 38  | 24                              | 25  |     |
| Histologic Subtype | 604                | 26       | Mucinous          | 25        | 24                        | 24  | 29  | 22                              | 22  |     |
|                    |                    |          | Not Mucinous      | 177       | 177                       | 177 | 220 | 155                             | 156 |     |
| Cancer Subsite     | 604                | 26       | Colon             | 149       | 149                       | 148 | 137 | 172                             | 137 |     |
|                    |                    |          | Rectal            | 53        | 53                        | 52  | 41  | 77                              | 40  |     |

|             |                       |     |    |           |     |     |     |     |     |     |
|-------------|-----------------------|-----|----|-----------|-----|-----|-----|-----|-----|-----|
|             | <b>Ancestry</b>       | 504 | 21 | African   | 20  | 20  | 20  | 20  | 20  | 20  |
|             |                       |     |    | European  | 148 | 148 | 148 | 132 | 180 | 132 |
|             | <b>BMI</b>            | 298 | 1  | <25       | 31  | 31  | 31  | 31  | 31  | 31  |
|             |                       |     |    | 25-34.9   | 56  | 55  | 55  | 56  | 55  | 55  |
|             |                       |     |    | 35+       | 13  | 13  | 13  | 13  | 13  | 13  |
|             | <b>MSI Status</b>     | 273 | 7  | MSS       | 64  | 64  | 64  | 164 | 17  | 11  |
|             |                       |     |    | MSI       | 27  | 27  | 27  | 66  | 7   | 8   |
|             | <b>PFS</b>            | 248 | 11 | ≤3 years  | 46  | 45  | 45  | 50  | 43  | 43  |
|             |                       |     |    | >3 years  | 38  | 37  | 37  | 40  | 36  | 36  |
|             | <b>RNF43</b>          | 577 | 21 | Driver    | 12  | 11  | 11  | 14  | 6   | 14  |
|             |                       |     |    | No Driver | 181 | 181 | 181 | 160 | 223 | 160 |
|             | <b>BRAF</b>           | 577 | 21 | Driver    | 18  | 18  | 17  | 16  | 19  | 18  |
|             |                       |     |    | No Driver | 175 | 175 | 174 | 213 | 156 | 155 |
|             | <b>Immune Subtype</b> | 576 | 22 | C1        | 148 | 148 | 148 | 135 | 173 | 136 |
|             |                       |     |    | C2        | 34  | 34  | 33  | 28  | 45  | 28  |
|             |                       |     |    | C3        | 6   | 6   | 6   | 3   | 12  | 3   |
|             |                       |     |    | C4        | 5   | 4   | 4   | 4   | 4   | 5   |
|             | <b>Age</b>            | 435 | 7  | 40-59     | 61  | 61  | 61  | 62  | 59  | 62  |
|             |                       |     |    | 60+       | 84  | 84  | 84  | 80  | 91  | 81  |
|             | <b>Stage</b>          | 400 | 7  | Stage I   | 87  | 87  | 87  | 87  | 87  | 87  |
|             |                       |     |    | Stage II  | 23  | 22  | 22  | 19  | 30  | 18  |
|             |                       |     |    | Stage III | 24  | 24  | 24  | 24  | 24  | 24  |
|             | <b>Gender</b>         | 450 | 7  | Male      | 110 | 109 | 109 | 109 | 110 | 109 |
|             |                       |     |    | Female    | 41  | 41  | 40  | 42  | 40  | 40  |
|             | <b>Grade</b>          | 428 | 7  | G1        | 19  | 19  | 18  | 17  | 21  | 18  |
|             |                       |     |    | G2        | 89  | 88  | 88  | 89  | 88  | 88  |
|             |                       |     |    | G3        | 36  | 36  | 35  | 34  | 40  | 33  |
| <b>HNSC</b> | <b>HPV Status</b>     | 437 | 2  | Negative  | 129 | 129 | 129 | 130 | 129 | 128 |
|             |                       |     |    | Positive  | 17  | 17  | 16  | 15  | 18  | 17  |
|             | <b>Ancestry</b>       | 402 | 2  | African   | 15  | 14  | 14  | 14  | 14  | 15  |
|             |                       |     |    | European  | 120 | 120 | 119 | 119 | 120 | 120 |
|             | <b>PFS</b>            | 274 | 2  | ≤3 years  | 52  | 52  | 52  | 52  | 52  | 52  |
|             |                       |     |    | >3 years  | 40  | 39  | 39  | 36  | 45  | 37  |
|             | <b>TP53</b>           | 446 | 3  | Driver    | 107 | 107 | 106 | 108 | 106 | 106 |
|             |                       |     |    | No Driver | 42  | 42  | 42  | 42  | 42  | 42  |
|             | <b>RHOA</b>           | 446 | 3  | Driver    | 2   | 2   | 1   | 2   | 2   | 1   |
|             |                       |     |    | No Driver | 147 | 147 | 147 | 147 | 147 | 147 |
|             | <b>Immune Subtype</b> | 433 | 2  | C1        | 38  | 38  | 37  | 36  | 38  | 39  |
|             |                       |     |    | C2        | 107 | 107 | 106 | 106 | 107 | 107 |
|             | <b>Age</b>            | 513 | 0  | <39       | 6   | 5   | 5   | 7   | 5   | 4   |
|             |                       |     |    | 40-59     | 74  | 73  | 73  | 68  | 83  | 69  |
|             |                       |     |    | 60+       | 93  | 92  | 92  | 94  | 92  | 91  |
|             | <b>Stage</b>          | 510 | 0  | Stage I   | 86  | 85  | 85  | 96  | 78  | 82  |
|             |                       |     |    | Stage II  | 19  | 19  | 19  | 22  | 19  | 16  |
|             |                       |     |    | Stage III | 40  | 40  | 39  | 41  | 35  | 43  |
|             |                       |     |    | Stage IV  | 26  | 26  | 26  | 19  | 30  | 29  |
| <b>KIRC</b> | <b>Gender</b>         | 513 | 0  | Male      | 111 | 110 | 110 | 115 | 108 | 108 |
|             |                       |     |    | Female    | 61  | 61  | 60  | 60  | 61  | 61  |
|             | <b>Grade</b>          | 505 | 0  | G1        | 5   | 4   | 4   | 3   | 6   | 4   |
|             |                       |     |    | G2        | 72  | 72  | 72  | 80  | 68  | 68  |
|             |                       |     |    | G3        | 68  | 67  | 67  | 65  | 68  | 69  |

|                       |     |    |           |     |     |     |     |     |     |
|-----------------------|-----|----|-----------|-----|-----|-----|-----|-----|-----|
|                       |     |    | G4        | 25  | 25  | 24  | 21  | 26  | 27  |
| <b>Ancestry</b>       | 426 | 0  | African   | 16  | 16  | 15  | 15  | 16  | 16  |
|                       |     |    | European  | 127 | 126 | 126 | 127 | 125 | 127 |
| <b>PFS</b>            | 346 | 0  | ≤3 years  | 39  | 39  | 38  | 37  | 44  | 35  |
|                       |     |    | >3 years  | 77  | 77  | 76  | 81  | 74  | 75  |
| <b>Immune Subtype</b> | 449 | 0  | C3        | 141 | 141 | 140 | 141 | 141 | 140 |
|                       |     |    | C4        | 9   | 9   | 9   | 9   | 9   | 9   |
| <b>Age</b>            | 446 | 10 | 40-59     | 42  | 42  | 41  | 42  | 41  | 42  |
|                       |     |    | 60+       | 111 | 110 | 110 | 110 | 111 | 110 |
| <b>Stage</b>          | 478 | 10 | Stage I   | 89  | 89  | 88  | 88  | 89  | 89  |
|                       |     |    | Stage II  | 39  | 39  | 39  | 39  | 39  | 39  |
|                       |     |    | Stage III | 23  | 23  | 23  | 23  | 23  | 23  |
|                       |     |    | Stage IV  | 9   | 9   | 8   | 9   | 8   | 9   |
| <b>Gender</b>         | 478 | 10 | Male      | 74  | 74  | 74  | 74  | 74  | 74  |
|                       |     |    | Female    | 86  | 85  | 85  | 85  | 86  | 85  |
| <b>ALK Fusion</b>     | 231 | 0  | Absent    | 67  | 67  | 66  | 67  | 66  | 67  |
|                       |     |    | Present   | 11  | 10  | 10  | 10  | 10  | 11  |
| <b>Ancestry</b>       | 434 | 6  | African   | 16  | 16  | 16  | 16  | 16  | 16  |
|                       |     |    | European  | 129 | 129 | 128 | 128 | 129 | 129 |
| <b>PFS</b>            | 258 | 3  | ≤3 years  | 57  | 56  | 56  | 56  | 56  | 57  |
|                       |     |    | >3 years  | 30  | 30  | 29  | 29  | 30  | 30  |
| <b>TP53</b>           | 471 | 9  | Driver    | 82  | 82  | 81  | 82  | 81  | 82  |
|                       |     |    | No Driver | 76  | 75  | 75  | 75  | 76  | 75  |
| <b>STK11</b>          | 471 | 9  | Driver    | 22  | 22  | 22  | 22  | 22  | 22  |
|                       |     |    | No Driver | 135 | 135 | 135 | 135 | 135 | 135 |
| <b>Immune Subtype</b> | 393 | 7  | C1        | 26  | 26  | 25  | 26  | 25  | 26  |
|                       |     |    | C2        | 45  | 45  | 45  | 45  | 45  | 45  |
|                       |     |    | C3        | 54  | 54  | 54  | 54  | 54  | 54  |
|                       |     |    | C4        | 7   | 6   | 6   | 7   | 6   | 6   |
| <b>Age</b>            | 468 | 4  | 40-59     | 29  | 28  | 28  | 28  | 28  | 29  |
|                       |     |    | 60+       | 128 | 128 | 127 | 128 | 128 | 127 |
| <b>Stage</b>          | 478 | 4  | Stage I   | 80  | 79  | 79  | 80  | 79  | 79  |
|                       |     |    | Stage II  | 51  | 51  | 51  | 51  | 51  | 51  |
|                       |     |    | Stage III | 27  | 27  | 27  | 27  | 27  | 27  |
|                       |     |    | Stage IV  | 2   | 2   | 2   | 2   | 2   | 2   |
| <b>Gender</b>         | 478 | 4  | Male      | 119 | 119 | 119 | 119 | 119 | 119 |
|                       |     |    | Female    | 41  | 40  | 40  | 40  | 41  | 40  |
| <b>ALK Fusion</b>     | 273 | 3  | Absent    | 89  | 88  | 88  | 89  | 88  | 88  |
|                       |     |    | Present   | 3   | 3   | 2   | 5   | 2   | 1   |
| <b>Ancestry</b>       | 426 | 4  | African   | 10  | 10  | 9   | 10  | 9   | 10  |
|                       |     |    | European  | 133 | 132 | 132 | 132 | 133 | 132 |
| <b>PFS</b>            | 231 | 4  | ≤3 years  | 37  | 37  | 37  | 37  | 37  | 37  |
|                       |     |    | >3 years  | 40  | 40  | 40  | 40  | 40  | 40  |
| <b>PIK3R1</b>         | 462 | 4  | Driver    | 2   | 2   | 1   | 2   | 2   | 1   |
|                       |     |    | No Driver | 153 | 152 | 152 | 153 | 152 | 152 |
| <b>Immune Subtype</b> | 435 | 3  | C1        | 88  | 87  | 87  | 88  | 87  | 87  |
|                       |     |    | C2        | 58  | 58  | 57  | 58  | 58  | 57  |



**Supplementary Table 7. One-Versus-Rest Area under the Receiver Operating Characteristic Curve (AUROC) for Prediction of Demographic, Clinical, and Genetic Features.**

| Dataset            | Feature    | Slide Adjustment Method | Standard Cross Validation |                            | Preserved Site Cross Validation |                            |                        |
|--------------------|------------|-------------------------|---------------------------|----------------------------|---------------------------------|----------------------------|------------------------|
|                    |            |                         | AUROC (Range)             | p-value, Compared to 0.500 | AUROC (Range)                   | p-value, Compared to 0.500 | p-value, Between Group |
| BRCA               | Stage      | Baseline                | 0.595 (0.541 - 0.663)     | $8.13 \times 10^{-14}$     | 0.557 (0.499 - 0.636)           | $4.53 \times 10^{-9}$      | $4.74 \times 10^{-4}$  |
|                    |            | Macenko                 | 0.598 (0.545 - 0.651)     | $2.75 \times 10^{-16}$     | 0.551 (0.491 - 0.610)           | $1.93 \times 10^{-9}$      | $1.79 \times 10^{-6}$  |
|                    |            | Reinhard                | 0.602 (0.535 - 0.670)     | $1.67 \times 10^{-17}$     | 0.571 (0.464 - 0.640)           | $3.62 \times 10^{-9}$      | $3.17 \times 10^{-3}$  |
|                    |            | Grayscale               | 0.600 (0.565 - 0.637)     | $5.73 \times 10^{-20}$     | 0.559 (0.499 - 0.603)           | $3.87 \times 10^{-12}$     | $1.16 \times 10^{-7}$  |
|                    |            | Normalized              | 0.627 (0.575 - 0.701)     | $8.26 \times 10^{-18}$     | 0.599 (0.551 - 0.651)           | $4.41 \times 10^{-18}$     | $9.52 \times 10^{-4}$  |
|                    |            | Light                   | 0.592 (0.542 - 0.641)     | $2.68 \times 10^{-18}$     | 0.581 (0.522 - 0.629)           | $7.12 \times 10^{-15}$     | $9.40 \times 10^{-2}$  |
|                    |            | Heavy                   | 0.603 (0.549 - 0.664)     | $1.19 \times 10^{-18}$     | 0.590 (0.538 - 0.645)           | $6.64 \times 10^{-16}$     | $5.44 \times 10^{-2}$  |
|                    | Age        | Baseline                | 0.602 (0.488 - 0.672)     | $1.38 \times 10^{-12}$     | 0.586 (0.534 - 0.636)           | $9.36 \times 10^{-15}$     | $1.05 \times 10^{-1}$  |
|                    |            | Macenko                 | 0.633 (0.545 - 0.701)     | $5.76 \times 10^{-17}$     | 0.591 (0.547 - 0.642)           | $7.16 \times 10^{-16}$     | $2.82 \times 10^{-5}$  |
|                    |            | Reinhard                | 0.605 (0.534 - 0.677)     | $9.04 \times 10^{-15}$     | 0.563 (0.512 - 0.645)           | $3.62 \times 10^{-9}$      | $1.88 \times 10^{-4}$  |
|                    |            | Grayscale               | 0.581 (0.497 - 0.633)     | $7.16 \times 10^{-13}$     | 0.574 (0.502 - 0.636)           | $4.11 \times 10^{-12}$     | $3.27 \times 10^{-1}$  |
|                    |            | Normalized              | 0.619 (0.548 - 0.698)     | $1.39 \times 10^{-17}$     | 0.570 (0.501 - 0.615)           | $1.17 \times 10^{-10}$     | $4.11 \times 10^{-6}$  |
|                    |            | Light                   | 0.617 (0.511 - 0.682)     | $4.10 \times 10^{-15}$     | 0.613 (0.562 - 0.673)           | $1.83 \times 10^{-16}$     | $4.34 \times 10^{-1}$  |
|                    |            | Heavy                   | 0.614 (0.531 - 0.683)     | $4.94 \times 10^{-16}$     | 0.597 (0.535 - 0.659)           | $7.21 \times 10^{-14}$     | $6.77 \times 10^{-2}$  |
|                    | ER status  | Baseline                | 0.857 (0.795 - 0.905)     | $3.93 \times 10^{-29}$     | 0.840 (0.770 - 0.893)           | $1.05 \times 10^{-26}$     | $6.29 \times 10^{-2}$  |
|                    |            | Macenko                 | 0.889 (0.814 - 0.936)     | $2.13 \times 10^{-30}$     | 0.856 (0.806 - 0.905)           | $1.05 \times 10^{-29}$     | $1.88 \times 10^{-4}$  |
|                    |            | Reinhard                | 0.885 (0.837 - 0.925)     | $2.99 \times 10^{-33}$     | 0.865 (0.814 - 0.915)           | $4.54 \times 10^{-30}$     | $5.47 \times 10^{-3}$  |
|                    |            | Grayscale               | 0.852 (0.781 - 0.901)     | $1.06 \times 10^{-30}$     | 0.842 (0.741 - 0.916)           | $1.30 \times 10^{-26}$     | $1.78 \times 10^{-1}$  |
|                    |            | Normalized              | 0.894 (0.844 - 0.941)     | $2.99 \times 10^{-33}$     | 0.870 (0.793 - 0.904)           | $2.23 \times 10^{-30}$     | $6.98 \times 10^{-4}$  |
|                    |            | Light                   | 0.866 (0.795 - 0.919)     | $4.83 \times 10^{-29}$     | 0.847 (0.752 - 0.909)           | $1.93 \times 10^{-25}$     | $6.38 \times 10^{-2}$  |
|                    |            | Heavy                   | 0.869 (0.793 - 0.918)     | $2.13 \times 10^{-30}$     | 0.853 (0.762 - 0.918)           | $1.67 \times 10^{-26}$     | $7.73 \times 10^{-2}$  |
|                    | PR Status  | Baseline                | 0.746 (0.663 - 0.821)     | $6.81 \times 10^{-22}$     | 0.722 (0.568 - 0.829)           | $5.88 \times 10^{-15}$     | $1.14 \times 10^{-1}$  |
|                    |            | Macenko                 | 0.779 (0.701 - 0.836)     | $5.14 \times 10^{-24}$     | 0.764 (0.699 - 0.825)           | $3.69 \times 10^{-24}$     | $1.23 \times 10^{-1}$  |
|                    |            | Reinhard                | 0.770 (0.703 - 0.834)     | $8.39 \times 10^{-25}$     | 0.794 (0.758 - 0.867)           | $2.67 \times 10^{-27}$     | $9.95 \times 10^{-1}$  |
|                    |            | Grayscale               | 0.763 (0.691 - 0.814)     | $1.66 \times 10^{-25}$     | 0.715 (0.620 - 0.780)           | $6.49 \times 10^{-22}$     | $9.30 \times 10^{-6}$  |
|                    |            | Normalized              | 0.796 (0.740 - 0.836)     | $2.71 \times 10^{-28}$     | 0.773 (0.714 - 0.836)           | $6.70 \times 10^{-25}$     | $1.08 \times 10^{-2}$  |
|                    |            | Light                   | 0.751 (0.676 - 0.813)     | $7.66 \times 10^{-24}$     | 0.754 (0.689 - 0.843)           | $5.09 \times 10^{-23}$     | $6.74 \times 10^{-1}$  |
|                    |            | Heavy                   | 0.773 (0.698 - 0.831)     | $2.62 \times 10^{-24}$     | 0.770 (0.710 - 0.862)           | $7.42 \times 10^{-24}$     | $4.62 \times 10^{-1}$  |
| HER2 Status        | Baseline   | 0.616 (0.505 - 0.709)   | $5.46 \times 10^{-12}$    | 0.603 (0.478 - 0.720)      | $3.08 \times 10^{-9}$           | $2.96 \times 10^{-1}$      |                        |
|                    | Macenko    | 0.652 (0.573 - 0.724)   | $2.74 \times 10^{-18}$    | 0.651 (0.517 - 0.734)      | $3.00 \times 10^{-15}$          | $5.63 \times 10^{-1}$      |                        |
|                    | Reinhard   | 0.626 (0.516 - 0.689)   | $3.32 \times 10^{-15}$    | 0.650 (0.511 - 0.789)      | $3.92 \times 10^{-11}$          | $9.83 \times 10^{-1}$      |                        |
|                    | Grayscale  | 0.600 (0.481 - 0.705)   | $1.87 \times 10^{-10}$    | 0.632 (0.522 - 0.733)      | $1.04 \times 10^{-12}$          | $9.95 \times 10^{-1}$      |                        |
|                    | Normalized | 0.656 (0.527 - 0.765)   | $1.50 \times 10^{-13}$    | 0.684 (0.617 - 0.761)      | $1.63 \times 10^{-19}$          | $9.95 \times 10^{-1}$      |                        |
|                    | Light      | 0.589 (0.504 - 0.650)   | $2.21 \times 10^{-11}$    | 0.576 (0.457 - 0.674)      | $2.60 \times 10^{-8}$           | $2.36 \times 10^{-1}$      |                        |
|                    | Heavy      | 0.601 (0.484 - 0.675)   | $8.75 \times 10^{-12}$    | 0.594 (0.513 - 0.667)      | $7.23 \times 10^{-12}$          | $3.62 \times 10^{-1}$      |                        |
| Histologic Subtype | Baseline   | 0.900 (0.808 - 0.966)   | $2.22 \times 10^{-26}$    | 0.835 (0.688 - 0.945)      | $1.06 \times 10^{-17}$          | $1.37 \times 10^{-3}$      |                        |
|                    | Macenko    | 0.929 (0.864 - 0.968)   | $3.85 \times 10^{-33}$    | 0.923 (0.826 - 0.968)      | $2.30 \times 10^{-28}$          | $3.27 \times 10^{-1}$      |                        |
|                    | Reinhard   | 0.920 (0.850 - 0.970)   | $7.93 \times 10^{-31}$    | 0.918 (0.862 - 0.965)      | $7.59 \times 10^{-30}$          | $4.63 \times 10^{-1}$      |                        |
|                    | Grayscale  | 0.900 (0.842 - 0.953)   | $3.08 \times 10^{-31}$    | 0.901 (0.816 - 0.969)      | $1.09 \times 10^{-26}$          | $6.13 \times 10^{-1}$      |                        |
|                    | Normalized | 0.928 (0.889 - 0.964)   | $2.41 \times 10^{-35}$    | 0.918 (0.862 - 0.960)      | $2.23 \times 10^{-30}$          | $1.22 \times 10^{-1}$      |                        |
|                    | Light      | 0.911 (0.864 - 0.964)   | $1.98 \times 10^{-32}$    | 0.894 (0.814 - 0.946)      | $8.79 \times 10^{-26}$          | $9.40 \times 10^{-2}$      |                        |
|                    | Heavy      | 0.912 (0.871 - 0.952)   | $2.16 \times 10^{-33}$    | 0.908 (0.840 - 0.959)      | $1.14 \times 10^{-26}$          | $4.36 \times 10^{-1}$      |                        |
|                    | Baseline   | 0.740 (0.667 - 0.818)   | $2.59 \times 10^{-22}$    | 0.733 (0.653 - 0.830)      | $4.62 \times 10^{-20}$          | $3.62 \times 10^{-1}$      |                        |

|                   |                   |                       |                        |                        |                        |                        |
|-------------------|-------------------|-----------------------|------------------------|------------------------|------------------------|------------------------|
| PAM50<br>Subtype  | Macenko           | 0.810 (0.741 - 0.863) | $9.61 \times 10^{-27}$ | 0.794 (0.717 - 0.869)  | $2.82 \times 10^{-22}$ | $1.23 \times 10^{-1}$  |
|                   | Reinhard          | 0.804 (0.747 - 0.850) | $5.78 \times 10^{-28}$ | 0.782 (0.696 - 0.867)  | $1.66 \times 10^{-21}$ | $5.05 \times 10^{-2}$  |
|                   | Grayscale         | 0.754 (0.656 - 0.807) | $7.66 \times 10^{-24}$ | 0.748 (0.670 - 0.837)  | $1.02 \times 10^{-20}$ | $3.70 \times 10^{-1}$  |
|                   | Normalized        | 0.817 (0.761 - 0.867) | $1.49 \times 10^{-28}$ | 0.788 (0.717 - 0.883)  | $3.12 \times 10^{-24}$ | $3.88 \times 10^{-3}$  |
|                   | Light             | 0.771 (0.728 - 0.831) | $6.29 \times 10^{-27}$ | 0.770 (0.638 - 0.861)  | $1.37 \times 10^{-19}$ | $5.64 \times 10^{-1}$  |
|                   | Heavy             | 0.790 (0.742 - 0.837) | $2.71 \times 10^{-28}$ | 0.782 (0.672 - 0.877)  | $2.76 \times 10^{-21}$ | $3.10 \times 10^{-1}$  |
|                   | Immune<br>Subtype | Baseline              | 0.645 (0.599 - 0.689)  | $3.34 \times 10^{-22}$ | 0.585 (0.509 - 0.631)  | $1.00 \times 10^{-14}$ |
| Macenko           |                   | 0.679 (0.631 - 0.713) | $4.94 \times 10^{-25}$ | 0.653 (0.589 - 0.734)  | $8.66 \times 10^{-20}$ | $1.61 \times 10^{-3}$  |
| Reinhard          |                   | 0.689 (0.636 - 0.730) | $2.48 \times 10^{-26}$ | 0.644 (0.591 - 0.708)  | $4.54 \times 10^{-19}$ | $6.84 \times 10^{-7}$  |
| Grayscale         |                   | 0.681 (0.643 - 0.719) | $1.66 \times 10^{-26}$ | 0.652 (0.613 - 0.694)  | $3.33 \times 10^{-24}$ | $9.03 \times 10^{-6}$  |
| Normalized        |                   | 0.694 (0.642 - 0.742) | $1.47 \times 10^{-26}$ | 0.670 (0.621 - 0.708)  | $2.45 \times 10^{-23}$ | $6.38 \times 10^{-4}$  |
| Light             |                   | 0.671 (0.611 - 0.705) | $2.38 \times 10^{-23}$ | 0.629 (0.586 - 0.679)  | $1.55 \times 10^{-19}$ | $1.68 \times 10^{-6}$  |
| Heavy             |                   | 0.684 (0.638 - 0.735) | $5.14 \times 10^{-24}$ | 0.649 (0.596 - 0.698)  | $1.11 \times 10^{-21}$ | $1.45 \times 10^{-5}$  |
| PFS               | Baseline          | 0.586 (0.436 - 0.688) | $1.19 \times 10^{-7}$  | 0.538 (0.383 - 0.694)  | $1.14 \times 10^{-2}$  | $1.90 \times 10^{-2}$  |
|                   | Macenko           | 0.546 (0.394 - 0.708) | $3.42 \times 10^{-3}$  | 0.586 (0.436 - 0.709)  | $1.55 \times 10^{-7}$  | $9.95 \times 10^{-1}$  |
|                   | Reinhard          | 0.599 (0.415 - 0.719) | $9.29 \times 10^{-8}$  | 0.620 (0.445 - 0.738)  | $4.81 \times 10^{-9}$  | $9.12 \times 10^{-1}$  |
|                   | Grayscale         | 0.502 (0.366 - 0.648) | $4.29 \times 10^{-1}$  | 0.516 (0.372 - 0.638)  | $1.07 \times 10^{-1}$  | $8.51 \times 10^{-1}$  |
|                   | Normalized        | 0.576 (0.375 - 0.713) | $4.80 \times 10^{-5}$  | 0.555 (0.472 - 0.681)  | $3.91 \times 10^{-5}$  | $2.15 \times 10^{-1}$  |
|                   | Light             | 0.520 (0.354 - 0.688) | $9.87 \times 10^{-2}$  | 0.537 (0.376 - 0.657)  | $5.12 \times 10^{-3}$  | $8.72 \times 10^{-1}$  |
|                   | Heavy             | 0.531 (0.382 - 0.697) | $3.04 \times 10^{-2}$  | 0.569 (0.438 - 0.658)  | $3.27 \times 10^{-6}$  | $9.95 \times 10^{-1}$  |
| BRCA1<br>Mutation | Baseline          | 0.723 (0.395 - 0.890) | $5.35 \times 10^{-12}$ | 0.629 (0.481 - 0.852)  | $1.69 \times 10^{-7}$  | $1.54 \times 10^{-3}$  |
|                   | Macenko           | 0.666 (0.258 - 0.850) | $7.64 \times 10^{-7}$  | 0.623 (0.428 - 0.787)  | $4.28 \times 10^{-7}$  | $1.45 \times 10^{-1}$  |
|                   | Reinhard          | 0.694 (0.295 - 0.933) | $5.14 \times 10^{-9}$  | 0.570 (0.417 - 0.780)  | $4.13 \times 10^{-4}$  | $2.56 \times 10^{-4}$  |
|                   | Grayscale         | 0.609 (0.424 - 0.812) | $1.62 \times 10^{-7}$  | 0.526 (0.370 - 0.714)  | $7.71 \times 10^{-2}$  | $1.30 \times 10^{-3}$  |
|                   | Normalized        | 0.614 (0.365 - 0.809) | $6.57 \times 10^{-6}$  | 0.586 (0.319 - 0.792)  | $4.17 \times 10^{-4}$  | $2.60 \times 10^{-1}$  |
|                   | Light             | 0.661 (0.232 - 0.890) | $1.94 \times 10^{-6}$  | 0.537 (0.395 - 0.670)  | $9.62 \times 10^{-3}$  | $4.35 \times 10^{-4}$  |
|                   | Heavy             | 0.613 (0.300 - 0.847) | $2.04 \times 10^{-5}$  | 0.525 (0.364 - 0.717)  | $1.11 \times 10^{-1}$  | $6.89 \times 10^{-3}$  |
| TP53              | Baseline          | 0.769 (0.676 - 0.822) | $6.53 \times 10^{-26}$ | 0.752 (0.695 - 0.853)  | $3.74 \times 10^{-21}$ | $1.01 \times 10^{-1}$  |
|                   | Macenko           | 0.805 (0.732 - 0.859) | $1.78 \times 10^{-28}$ | 0.788 (0.697 - 0.870)  | $1.37 \times 10^{-21}$ | $1.22 \times 10^{-1}$  |
|                   | Reinhard          | 0.794 (0.718 - 0.862) | $4.53 \times 10^{-25}$ | 0.790 (0.705 - 0.857)  | $4.60 \times 10^{-24}$ | $4.16 \times 10^{-1}$  |
|                   | Grayscale         | 0.794 (0.723 - 0.848) | $3.80 \times 10^{-26}$ | 0.781 (0.726 - 0.850)  | $4.60 \times 10^{-24}$ | $1.41 \times 10^{-1}$  |
|                   | Normalized        | 0.804 (0.736 - 0.880) | $4.75 \times 10^{-26}$ | 0.804 (0.739 - 0.872)  | $1.67 \times 10^{-26}$ | $5.84 \times 10^{-1}$  |
|                   | Light             | 0.797 (0.724 - 0.857) | $2.16 \times 10^{-26}$ | 0.777 (0.729 - 0.853)  | $3.33 \times 10^{-24}$ | $4.68 \times 10^{-2}$  |
|                   | Heavy             | 0.809 (0.747 - 0.874) | $4.75 \times 10^{-26}$ | 0.784 (0.736 - 0.851)  | $1.49 \times 10^{-25}$ | $1.26 \times 10^{-2}$  |
| MAP3K1            | Baseline          | 0.654 (0.503 - 0.788) | $1.97 \times 10^{-10}$ | 0.585 (0.428 - 0.725)  | $8.56 \times 10^{-7}$  | $2.48 \times 10^{-3}$  |
|                   | Macenko           | 0.679 (0.539 - 0.797) | $2.82 \times 10^{-12}$ | 0.681 (0.524 - 0.809)  | $2.39 \times 10^{-13}$ | $6.13 \times 10^{-1}$  |
|                   | Reinhard          | 0.684 (0.531 - 0.814) | $6.05 \times 10^{-12}$ | 0.660 (0.515 - 0.793)  | $1.07 \times 10^{-12}$ | $1.80 \times 10^{-1}$  |
|                   | Grayscale         | 0.693 (0.607 - 0.834) | $1.81 \times 10^{-15}$ | 0.627 (0.553 - 0.690)  | $4.05 \times 10^{-15}$ | $4.90 \times 10^{-5}$  |
|                   | Normalized        | 0.773 (0.659 - 0.876) | $2.44 \times 10^{-20}$ | 0.669 (0.489 - 0.837)  | $9.62 \times 10^{-10}$ | $2.49 \times 10^{-5}$  |
|                   | Light             | 0.669 (0.579 - 0.761) | $3.32 \times 10^{-15}$ | 0.634 (0.542 - 0.784)  | $7.12 \times 10^{-13}$ | $2.42 \times 10^{-2}$  |
|                   | Heavy             | 0.726 (0.653 - 0.843) | $2.21 \times 10^{-18}$ | 0.642 (0.558 - 0.769)  | $2.39 \times 10^{-13}$ | $1.92 \times 10^{-6}$  |
| Ancestry          | Baseline          | 0.798 (0.719 - 0.893) | $6.80 \times 10^{-25}$ | 0.507 (0.306 - 0.713)  | $3.91 \times 10^{-1}$  | $4.88 \times 10^{-15}$ |
|                   | Macenko           | 0.627 (0.523 - 0.777) | $7.89 \times 10^{-8}$  | 0.558 (0.435 - 0.661)  | $1.66 \times 10^{-4}$  | $4.84 \times 10^{-3}$  |
|                   | Reinhard          | 0.792 (0.688 - 0.837) | $1.49 \times 10^{-25}$ | 0.638 (0.536 - 0.759)  | $1.93 \times 10^{-12}$ | $4.06 \times 10^{-15}$ |
|                   | Grayscale         | 0.738 (0.619 - 0.814) | $3.92 \times 10^{-20}$ | 0.581 (0.478 - 0.672)  | $4.96 \times 10^{-9}$  | $4.14 \times 10^{-15}$ |
|                   | Normalized        | 0.750 (0.677 - 0.806) | $9.77 \times 10^{-25}$ | 0.624 (0.547 - 0.758)  | $7.12 \times 10^{-13}$ | $3.41 \times 10^{-14}$ |
|                   | Light             | 0.778 (0.699 - 0.839) | $5.11 \times 10^{-25}$ | 0.549 (0.406 - 0.682)  | $7.59 \times 10^{-4}$  | $3.61 \times 10^{-19}$ |
|                   | Heavy             | 0.778 (0.662 - 0.852) | $6.82 \times 10^{-24}$ | 0.561 (0.456 - 0.696)  | $2.10 \times 10^{-6}$  | $3.22 \times 10^{-21}$ |
| Age               | Baseline          | 0.605 (0.528 - 0.726) | $1.71 \times 10^{-10}$ | 0.479 (0.375 - 0.614)  | $9.82 \times 10^{-1}$  | $1.75 \times 10^{-9}$  |

|              |                       |                       |                        |                        |                        |                        |                        |
|--------------|-----------------------|-----------------------|------------------------|------------------------|------------------------|------------------------|------------------------|
| COAD<br>READ | Stage                 | Macenko               | 0.571 (0.428 - 0.681)  | $1.62 \times 10^{-6}$  | 0.483 (0.390 - 0.606)  | $9.82 \times 10^{-1}$  | $2.34 \times 10^{-6}$  |
|              |                       | Reinhard              | 0.621 (0.531 - 0.778)  | $4.04 \times 10^{-11}$ | 0.475 (0.339 - 0.610)  | $9.82 \times 10^{-1}$  | $9.47 \times 10^{-10}$ |
|              |                       | Grayscale             | 0.587 (0.500 - 0.755)  | $4.38 \times 10^{-8}$  | 0.527 (0.390 - 0.685)  | $4.07 \times 10^{-2}$  | $2.13 \times 10^{-3}$  |
|              |                       | Normalized            | 0.597 (0.504 - 0.752)  | $1.50 \times 10^{-9}$  | 0.467 (0.388 - 0.533)  | $1.00 \times 10^{-0}$  | $2.17 \times 10^{-11}$ |
|              |                       | Light                 | 0.567 (0.459 - 0.669)  | $5.70 \times 10^{-7}$  | 0.487 (0.334 - 0.598)  | $9.54 \times 10^{-1}$  | $8.35 \times 10^{-6}$  |
|              |                       | Heavy                 | 0.579 (0.465 - 0.725)  | $1.07 \times 10^{-7}$  | 0.486 (0.359 - 0.619)  | $9.61 \times 10^{-1}$  | $9.35 \times 10^{-7}$  |
|              |                       | Baseline              | 0.586 (0.517 - 0.657)  | $2.45 \times 10^{-12}$ | 0.565 (0.494 - 0.688)  | $8.36 \times 10^{-8}$  | $5.27 \times 10^{-2}$  |
|              | Histologic<br>Subtype | Macenko               | 0.600 (0.524 - 0.684)  | $7.57 \times 10^{-12}$ | 0.578 (0.475 - 0.670)  | $9.65 \times 10^{-9}$  | $6.44 \times 10^{-2}$  |
|              |                       | Reinhard              | 0.619 (0.555 - 0.688)  | $1.54 \times 10^{-15}$ | 0.576 (0.466 - 0.681)  | $5.06 \times 10^{-7}$  | $2.61 \times 10^{-3}$  |
|              |                       | Grayscale             | 0.563 (0.528 - 0.631)  | $1.06 \times 10^{-12}$ | 0.552 (0.474 - 0.608)  | $5.45 \times 10^{-9}$  | $1.17 \times 10^{-1}$  |
|              |                       | Normalized            | 0.600 (0.550 - 0.660)  | $7.75 \times 10^{-18}$ | 0.587 (0.522 - 0.643)  | $4.71 \times 10^{-13}$ | $7.75 \times 10^{-2}$  |
|              |                       | Light                 | 0.586 (0.539 - 0.633)  | $2.37 \times 10^{-15}$ | 0.574 (0.492 - 0.650)  | $2.81 \times 10^{-10}$ | $1.18 \times 10^{-1}$  |
|              |                       | Heavy                 | 0.588 (0.538 - 0.649)  | $1.01 \times 10^{-13}$ | 0.566 (0.496 - 0.661)  | $2.33 \times 10^{-8}$  | $3.81 \times 10^{-2}$  |
|              |                       | Baseline              | 0.788 (0.703 - 0.844)  | $2.97 \times 10^{-24}$ | 0.712 (0.579 - 0.799)  | $6.15 \times 10^{-16}$ | $2.14 \times 10^{-6}$  |
|              | Cancer<br>Subsite     | Macenko               | 0.839 (0.719 - 0.898)  | $2.68 \times 10^{-23}$ | 0.774 (0.686 - 0.865)  | $4.29 \times 10^{-20}$ | $2.11 \times 10^{-5}$  |
|              |                       | Reinhard              | 0.883 (0.794 - 0.958)  | $7.64 \times 10^{-26}$ | 0.768 (0.612 - 0.883)  | $1.10 \times 10^{-16}$ | $4.65 \times 10^{-9}$  |
|              |                       | Grayscale             | 0.844 (0.755 - 0.948)  | $2.68 \times 10^{-23}$ | 0.757 (0.667 - 0.842)  | $4.33 \times 10^{-18}$ | $5.58 \times 10^{-7}$  |
|              |                       | Normalized            | 0.854 (0.775 - 0.913)  | $9.77 \times 10^{-26}$ | 0.829 (0.761 - 0.901)  | $2.72 \times 10^{-24}$ | $1.95 \times 10^{-2}$  |
|              |                       | Light                 | 0.827 (0.722 - 0.919)  | $1.95 \times 10^{-22}$ | 0.767 (0.660 - 0.891)  | $9.80 \times 10^{-18}$ | $3.22 \times 10^{-4}$  |
|              |                       | Heavy                 | 0.863 (0.787 - 0.951)  | $7.75 \times 10^{-25}$ | 0.777 (0.682 - 0.869)  | $1.17 \times 10^{-19}$ | $1.12 \times 10^{-7}$  |
|              |                       | Baseline              | 0.548 (0.387 - 0.682)  | $6.56 \times 10^{-4}$  | 0.547 (0.406 - 0.660)  | $1.01 \times 10^{-3}$  | $5.29 \times 10^{-1}$  |
|              | Ancestry              | Macenko               | 0.582 (0.441 - 0.681)  | $1.60 \times 10^{-7}$  | 0.573 (0.459 - 0.703)  | $7.48 \times 10^{-6}$  | $3.77 \times 10^{-1}$  |
|              |                       | Reinhard              | 0.601 (0.482 - 0.711)  | $2.81 \times 10^{-10}$ | 0.593 (0.486 - 0.696)  | $1.14 \times 10^{-10}$ | $3.51 \times 10^{-1}$  |
|              |                       | Grayscale             | 0.616 (0.526 - 0.722)  | $3.42 \times 10^{-11}$ | 0.595 (0.490 - 0.741)  | $6.69 \times 10^{-9}$  | $1.26 \times 10^{-1}$  |
|              |                       | Normalized            | 0.654 (0.578 - 0.750)  | $2.69 \times 10^{-17}$ | 0.584 (0.411 - 0.749)  | $7.85 \times 10^{-6}$  | $1.67 \times 10^{-4}$  |
|              |                       | Light                 | 0.587 (0.480 - 0.733)  | $4.56 \times 10^{-8}$  | 0.596 (0.480 - 0.713)  | $1.07 \times 10^{-7}$  | $7.19 \times 10^{-1}$  |
|              |                       | Heavy                 | 0.634 (0.536 - 0.731)  | $2.98 \times 10^{-13}$ | 0.595 (0.494 - 0.698)  | $2.85 \times 10^{-9}$  | $9.98 \times 10^{-3}$  |
|              |                       | Baseline              | 0.883 (0.755 - 0.976)  | $8.42 \times 10^{-23}$ | 0.795 (0.564 - 0.928)  | $1.28 \times 10^{-15}$ | $7.23 \times 10^{-5}$  |
| BMI          | Macenko               | 0.883 (0.753 - 0.937) | $7.68 \times 10^{-26}$ | 0.573 (0.108 - 0.892)  | $1.21 \times 10^{-1}$  | $2.79 \times 10^{-6}$  |                        |
|              | Reinhard              | 0.895 (0.803 - 0.959) | $4.01 \times 10^{-25}$ | 0.525 (0.003 - 0.918)  | $4.24 \times 10^{-1}$  | $9.52 \times 10^{-6}$  |                        |
|              | Grayscale             | 0.890 (0.790 - 0.967) | $1.39 \times 10^{-24}$ | 0.802 (0.631 - 0.941)  | $4.41 \times 10^{-16}$ | $2.23 \times 10^{-5}$  |                        |
|              | Normalized            | 0.859 (0.734 - 0.981) | $1.38 \times 10^{-19}$ | 0.495 (0.117 - 0.805)  | $6.22 \times 10^{-1}$  | $3.99 \times 10^{-8}$  |                        |
|              | Light                 | 0.884 (0.803 - 0.955) | $4.34 \times 10^{-25}$ | 0.799 (0.615 - 0.942)  | $2.51 \times 10^{-15}$ | $7.84 \times 10^{-5}$  |                        |
|              | Heavy                 | 0.891 (0.784 - 0.961) | $4.01 \times 10^{-25}$ | 0.827 (0.617 - 0.977)  | $3.99 \times 10^{-15}$ | $4.18 \times 10^{-3}$  |                        |
|              | Baseline              | 0.551 (0.462 - 0.691) | $6.06 \times 10^{-5}$  | 0.475 (0.360 - 0.577)  | $1.00 \times 10^{-0}$  | $1.41 \times 10^{-5}$  |                        |
| PFS          | Macenko               | 0.573 (0.469 - 0.679) | $4.19 \times 10^{-8}$  | 0.560 (0.462 - 0.678)  | $3.45 \times 10^{-5}$  | $2.84 \times 10^{-1}$  |                        |
|              | Reinhard              | 0.573 (0.491 - 0.672) | $4.90 \times 10^{-8}$  | 0.527 (0.410 - 0.641)  | $3.46 \times 10^{-2}$  | $7.61 \times 10^{-3}$  |                        |
|              | Grayscale             | 0.549 (0.425 - 0.672) | $9.50 \times 10^{-5}$  | 0.496 (0.409 - 0.620)  | $7.18 \times 10^{-1}$  | $2.13 \times 10^{-3}$  |                        |
|              | Normalized            | 0.576 (0.507 - 0.689) | $1.80 \times 10^{-9}$  | 0.544 (0.434 - 0.635)  | $3.62 \times 10^{-4}$  | $2.01 \times 10^{-2}$  |                        |
|              | Light                 | 0.563 (0.452 - 0.680) | $2.01 \times 10^{-6}$  | 0.522 (0.421 - 0.618)  | $4.48 \times 10^{-2}$  | $1.09 \times 10^{-2}$  |                        |
|              | Heavy                 | 0.551 (0.447 - 0.670) | $7.59 \times 10^{-5}$  | 0.539 (0.412 - 0.653)  | $6.48 \times 10^{-3}$  | $3.16 \times 10^{-1}$  |                        |
|              | Baseline              | 0.530 (0.375 - 0.700) | $4.66 \times 10^{-2}$  | 0.479 (0.391 - 0.721)  | $9.82 \times 10^{-1}$  | $2.26 \times 10^{-2}$  |                        |
| PFS          | Macenko               | 0.594 (0.431 - 0.791) | $3.80 \times 10^{-5}$  | 0.591 (0.413 - 0.738)  | $1.33 \times 10^{-5}$  | $5.27 \times 10^{-1}$  |                        |
|              | Reinhard              | 0.586 (0.348 - 0.764) | $4.90 \times 10^{-4}$  | 0.572 (0.377 - 0.683)  | $2.78 \times 10^{-5}$  | $3.73 \times 10^{-1}$  |                        |
|              | Grayscale             | 0.541 (0.314 - 0.741) | $2.83 \times 10^{-2}$  | 0.523 (0.397 - 0.638)  | $4.78 \times 10^{-2}$  | $2.93 \times 10^{-1}$  |                        |
|              | Normalized            | 0.578 (0.384 - 0.745) | $1.90 \times 10^{-4}$  | 0.603 (0.413 - 0.746)  | $6.16 \times 10^{-7}$  | $8.65 \times 10^{-1}$  |                        |
|              | Light                 | 0.516 (0.365 - 0.672) | $1.22 \times 10^{-1}$  | 0.524 (0.391 - 0.628)  | $3.15 \times 10^{-2}$  | $7.00 \times 10^{-1}$  |                        |
|              | Heavy                 | 0.540 (0.317 - 0.707) | $1.34 \times 10^{-2}$  | 0.531 (0.396 - 0.622)  | $8.52 \times 10^{-3}$  | $3.91 \times 10^{-1}$  |                        |
|              | Baseline              | 0.626 (0.547 - 0.739) | $1.15 \times 10^{-13}$ | 0.607 (0.518 - 0.765)  | $3.65 \times 10^{-9}$  | $1.40 \times 10^{-1}$  |                        |

|                |            |                       |                        |                       |                        |                        |
|----------------|------------|-----------------------|------------------------|-----------------------|------------------------|------------------------|
| Immune Subtype | Macenko    | 0.646 (0.577 - 0.776) | $2.15 \times 10^{-14}$ | 0.686 (0.491 - 0.828) | $3.23 \times 10^{-13}$ | $1.00 \times 10^{-0}$  |
|                | Reinhard   | 0.621 (0.526 - 0.744) | $2.98 \times 10^{-13}$ | 0.558 (0.449 - 0.685) | $9.14 \times 10^{-6}$  | $5.12 \times 10^{-5}$  |
|                | Grayscale  | 0.680 (0.621 - 0.755) | $9.07 \times 10^{-19}$ | 0.615 (0.466 - 0.734) | $2.44 \times 10^{-10}$ | $2.11 \times 10^{-5}$  |
|                | Normalized | 0.664 (0.589 - 0.748) | $2.93 \times 10^{-16}$ | 0.618 (0.468 - 0.809) | $3.26 \times 10^{-7}$  | $1.97 \times 10^{-2}$  |
|                | Light      | 0.639 (0.557 - 0.723) | $1.05 \times 10^{-16}$ | 0.552 (0.416 - 0.675) | $7.78 \times 10^{-4}$  | $2.59 \times 10^{-6}$  |
|                | Heavy      | 0.659 (0.586 - 0.736) | $1.09 \times 10^{-16}$ | 0.610 (0.454 - 0.735) | $6.19 \times 10^{-8}$  | $5.62 \times 10^{-3}$  |
| BRAF           | Baseline   | 0.715 (0.535 - 0.896) | $1.23 \times 10^{-11}$ | 0.699 (0.476 - 0.892) | $7.90 \times 10^{-9}$  | $3.73 \times 10^{-1}$  |
|                | Macenko    | 0.743 (0.606 - 0.838) | $1.03 \times 10^{-17}$ | 0.816 (0.674 - 0.886) | $3.02 \times 10^{-20}$ | $1.00 \times 10^{-0}$  |
|                | Reinhard   | 0.779 (0.684 - 0.881) | $5.82 \times 10^{-21}$ | 0.754 (0.526 - 0.851) | $1.33 \times 10^{-14}$ | $1.39 \times 10^{-1}$  |
|                | Grayscale  | 0.712 (0.563 - 0.892) | $6.57 \times 10^{-12}$ | 0.576 (0.285 - 0.790) | $1.33 \times 10^{-3}$  | $2.23 \times 10^{-5}$  |
|                | Normalized | 0.761 (0.626 - 0.926) | $1.03 \times 10^{-14}$ | 0.753 (0.556 - 0.860) | $1.28 \times 10^{-15}$ | $4.19 \times 10^{-1}$  |
|                | Light      | 0.742 (0.602 - 0.871) | $1.28 \times 10^{-14}$ | 0.619 (0.358 - 0.729) | $2.33 \times 10^{-8}$  | $1.49 \times 10^{-6}$  |
| RNF43          | Heavy      | 0.746 (0.593 - 0.889) | $9.32 \times 10^{-15}$ | 0.555 (0.380 - 0.664) | $3.35 \times 10^{-4}$  | $2.17 \times 10^{-11}$ |
|                | Baseline   | 0.688 (0.472 - 0.825) | $5.39 \times 10^{-12}$ | 0.494 (0.333 - 0.594) | $7.18 \times 10^{-1}$  | $3.46 \times 10^{-10}$ |
|                | Macenko    | 0.701 (0.473 - 0.829) | $2.29 \times 10^{-13}$ | 0.581 (0.327 - 0.741) | $3.62 \times 10^{-4}$  | $2.11 \times 10^{-5}$  |
|                | Reinhard   | 0.726 (0.484 - 0.897) | $5.19 \times 10^{-13}$ | 0.518 (0.249 - 0.780) | $2.98 \times 10^{-1}$  | $5.90 \times 10^{-8}$  |
|                | Grayscale  | 0.736 (0.505 - 0.862) | $3.16 \times 10^{-14}$ | 0.582 (0.434 - 0.752) | $3.65 \times 10^{-6}$  | $9.58 \times 10^{-9}$  |
|                | Normalized | 0.759 (0.564 - 0.885) | $1.83 \times 10^{-14}$ | 0.737 (0.654 - 0.917) | $1.28 \times 10^{-15}$ | $2.12 \times 10^{-1}$  |
| MSI Status     | Light      | 0.724 (0.535 - 0.966) | $1.06 \times 10^{-12}$ | 0.584 (0.438 - 0.867) | $3.36 \times 10^{-4}$  | $8.35 \times 10^{-6}$  |
|                | Heavy      | 0.734 (0.541 - 0.870) | $3.56 \times 10^{-14}$ | 0.611 (0.359 - 0.863) | $5.49 \times 10^{-4}$  | $5.48 \times 10^{-4}$  |
|                | Baseline   | 0.616 (0.508 - 0.742) | $1.40 \times 10^{-8}$  | 0.572 (0.361 - 0.843) | $1.77 \times 10^{-3}$  | $7.99 \times 10^{-2}$  |
|                | Macenko    | 0.645 (0.528 - 0.789) | $7.31 \times 10^{-11}$ | 0.641 (0.267 - 0.968) | $1.31 \times 10^{-4}$  | $5.22 \times 10^{-1}$  |
|                | Reinhard   | 0.639 (0.556 - 0.754) | $8.72 \times 10^{-13}$ | 0.640 (0.468 - 0.830) | $3.71 \times 10^{-6}$  | $5.59 \times 10^{-1}$  |
|                | Grayscale  | 0.588 (0.398 - 0.744) | $4.93 \times 10^{-6}$  | 0.601 (0.384 - 0.916) | $1.03 \times 10^{-3}$  | $7.00 \times 10^{-1}$  |
| Age            | Normalized | 0.633 (0.522 - 0.715) | $4.35 \times 10^{-13}$ | 0.630 (0.382 - 0.926) | $1.49 \times 10^{-4}$  | $5.22 \times 10^{-1}$  |
|                | Light      | 0.620 (0.472 - 0.728) | $1.16 \times 10^{-9}$  | 0.579 (0.371 - 0.815) | $1.22 \times 10^{-3}$  | $9.72 \times 10^{-2}$  |
|                | Heavy      | 0.610 (0.477 - 0.720) | $1.16 \times 10^{-8}$  | 0.609 (0.372 - 0.852) | $1.03 \times 10^{-3}$  | $5.29 \times 10^{-1}$  |
|                | Baseline   | 0.526 (0.334 - 0.681) | $6.56 \times 10^{-2}$  | 0.506 (0.394 - 0.609) | $3.92 \times 10^{-1}$  | $2.36 \times 10^{-1}$  |
|                | Macenko    | 0.551 (0.444 - 0.678) | $2.08 \times 10^{-4}$  | 0.520 (0.354 - 0.677) | $1.98 \times 10^{-1}$  | $1.33 \times 10^{-1}$  |
|                | Reinhard   | 0.540 (0.424 - 0.631) | $5.49 \times 10^{-4}$  | 0.534 (0.469 - 0.626) | $1.68 \times 10^{-3}$  | $4.33 \times 10^{-1}$  |
| HNSC           | Grayscale  | 0.516 (0.419 - 0.632) | $6.63 \times 10^{-2}$  | 0.516 (0.413 - 0.634) | $1.52 \times 10^{-1}$  | $5.69 \times 10^{-1}$  |
|                | Normalized | 0.556 (0.467 - 0.661) | $3.27 \times 10^{-6}$  | 0.575 (0.488 - 0.663) | $4.54 \times 10^{-8}$  | $9.34 \times 10^{-1}$  |
|                | Light      | 0.518 (0.432 - 0.610) | $4.16 \times 10^{-2}$  | 0.501 (0.361 - 0.699) | $6.18 \times 10^{-1}$  | $2.79 \times 10^{-1}$  |
|                | Heavy      | 0.522 (0.437 - 0.597) | $9.03 \times 10^{-3}$  | 0.508 (0.406 - 0.629) | $3.65 \times 10^{-1}$  | $2.70 \times 10^{-1}$  |
|                | Baseline   | 0.543 (0.450 - 0.608) | $5.02 \times 10^{-6}$  | 0.489 (0.410 - 0.573) | $9.79 \times 10^{-1}$  | $1.36 \times 10^{-4}$  |
|                | Macenko    | 0.569 (0.416 - 0.666) | $3.71 \times 10^{-6}$  | 0.519 (0.436 - 0.596) | $7.36 \times 10^{-3}$  | $1.76 \times 10^{-3}$  |
| Stage          | Reinhard   | 0.519 (0.428 - 0.651) | $3.01 \times 10^{-2}$  | 0.474 (0.377 - 0.553) | $1.00 \times 10^{-0}$  | $3.47 \times 10^{-3}$  |
|                | Grayscale  | 0.524 (0.440 - 0.619) | $1.72 \times 10^{-3}$  | 0.527 (0.424 - 0.704) | $1.77 \times 10^{-2}$  | $6.47 \times 10^{-1}$  |
|                | Normalized | 0.545 (0.445 - 0.659) | $3.48 \times 10^{-5}$  | 0.499 (0.415 - 0.632) | $6.83 \times 10^{-1}$  | $3.47 \times 10^{-3}$  |
|                | Light      | 0.548 (0.461 - 0.627) | $1.88 \times 10^{-6}$  | 0.532 (0.443 - 0.725) | $7.86 \times 10^{-3}$  | $1.97 \times 10^{-1}$  |
|                | Heavy      | 0.547 (0.468 - 0.647) | $1.57 \times 10^{-5}$  | 0.537 (0.451 - 0.734) | $2.20 \times 10^{-3}$  | $3.09 \times 10^{-1}$  |
|                | Baseline   | 0.560 (0.442 - 0.653) | $2.21 \times 10^{-7}$  | 0.581 (0.459 - 0.675) | $6.07 \times 10^{-7}$  | $9.34 \times 10^{-1}$  |
| Gender         | Macenko    | 0.652 (0.528 - 0.792) | $4.38 \times 10^{-13}$ | 0.590 (0.495 - 0.720) | $2.72 \times 10^{-7}$  | $2.04 \times 10^{-3}$  |
|                | Reinhard   | 0.620 (0.492 - 0.730) | $2.06 \times 10^{-11}$ | 0.619 (0.525 - 0.718) | $2.44 \times 10^{-11}$ | $5.69 \times 10^{-1}$  |
|                | Grayscale  | 0.575 (0.447 - 0.735) | $7.34 \times 10^{-5}$  | 0.544 (0.398 - 0.649) | $1.37 \times 10^{-3}$  | $1.27 \times 10^{-1}$  |
|                | Normalized | 0.622 (0.529 - 0.693) | $1.71 \times 10^{-14}$ | 0.643 (0.553 - 0.701) | $2.90 \times 10^{-16}$ | $9.73 \times 10^{-1}$  |
|                | Light      | 0.539 (0.413 - 0.646) | $2.26 \times 10^{-4}$  | 0.543 (0.358 - 0.659) | $2.38 \times 10^{-3}$  | $6.47 \times 10^{-1}$  |
|                | Heavy      | 0.560 (0.427 - 0.664) | $5.70 \times 10^{-6}$  | 0.562 (0.405 - 0.694) | $5.24 \times 10^{-5}$  | $6.12 \times 10^{-1}$  |
| Grade          | Baseline   | 0.584 (0.452 - 0.704) | $6.08 \times 10^{-8}$  | 0.555 (0.468 - 0.655) | $1.75 \times 10^{-5}$  | $8.52 \times 10^{-2}$  |

|                |     |            |                       |                        |                       |                        |                       |
|----------------|-----|------------|-----------------------|------------------------|-----------------------|------------------------|-----------------------|
|                |     | Macenko    | 0.665 (0.598 - 0.745) | $1.68 \times 10^{-17}$ | 0.660 (0.580 - 0.741) | $3.23 \times 10^{-18}$ | $3.88 \times 10^{-1}$ |
|                |     | Reinhard   | 0.598 (0.466 - 0.741) | $2.44 \times 10^{-8}$  | 0.573 (0.454 - 0.704) | $4.93 \times 10^{-6}$  | $1.48 \times 10^{-1}$ |
|                |     | Grayscale  | 0.587 (0.468 - 0.694) | $9.53 \times 10^{-8}$  | 0.577 (0.476 - 0.678) | $9.78 \times 10^{-7}$  | $3.53 \times 10^{-1}$ |
|                |     | Normalized | 0.651 (0.525 - 0.752) | $9.40 \times 10^{-14}$ | 0.629 (0.525 - 0.720) | $5.40 \times 10^{-12}$ | $1.33 \times 10^{-1}$ |
|                |     | Light      | 0.622 (0.502 - 0.710) | $3.76 \times 10^{-13}$ | 0.609 (0.485 - 0.724) | $3.44 \times 10^{-10}$ | $2.60 \times 10^{-1}$ |
|                |     | Heavy      | 0.618 (0.491 - 0.715) | $1.65 \times 10^{-11}$ | 0.589 (0.491 - 0.693) | $7.61 \times 10^{-10}$ | $6.04 \times 10^{-2}$ |
| Ancestry       |     | Baseline   | 0.720 (0.525 - 0.853) | $2.21 \times 10^{-12}$ | 0.570 (0.303 - 0.829) | $1.99 \times 10^{-2}$  | $3.78 \times 10^{-4}$ |
|                |     | Macenko    | 0.587 (0.342 - 0.869) | $1.43 \times 10^{-3}$  | 0.541 (0.212 - 0.745) | $1.17 \times 10^{-1}$  | $1.97 \times 10^{-1}$ |
|                |     | Reinhard   | 0.713 (0.451 - 0.866) | $6.84 \times 10^{-12}$ | 0.649 (0.413 - 0.847) | $4.03 \times 10^{-6}$  | $6.04 \times 10^{-2}$ |
|                |     | Grayscale  | 0.548 (0.327 - 0.705) | $3.85 \times 10^{-3}$  | 0.454 (0.249 - 0.731) | $1.00 \times 10^{-0}$  | $3.47 \times 10^{-3}$ |
|                |     | Normalized | 0.579 (0.370 - 0.802) | $1.70 \times 10^{-3}$  | 0.472 (0.229 - 0.731) | $9.79 \times 10^{-1}$  | $5.17 \times 10^{-3}$ |
|                |     | Light      | 0.600 (0.349 - 0.828) | $6.28 \times 10^{-4}$  | 0.483 (0.285 - 0.738) | $8.90 \times 10^{-1}$  | $3.47 \times 10^{-3}$ |
|                |     | Heavy      | 0.553 (0.266 - 0.782) | $3.05 \times 10^{-2}$  | 0.494 (0.287 - 0.804) | $7.59 \times 10^{-1}$  | $1.11 \times 10^{-1}$ |
| HPV Status     |     | Baseline   | 0.914 (0.800 - 0.970) | $5.87 \times 10^{-28}$ | 0.846 (0.731 - 0.971) | $3.13 \times 10^{-17}$ | $1.38 \times 10^{-3}$ |
|                |     | Macenko    | 0.902 (0.851 - 0.963) | $4.23 \times 10^{-29}$ | 0.856 (0.658 - 0.976) | $6.17 \times 10^{-17}$ | $2.42 \times 10^{-2}$ |
|                |     | Reinhard   | 0.929 (0.839 - 0.975) | $2.17 \times 10^{-29}$ | 0.914 (0.810 - 0.989) | $1.92 \times 10^{-23}$ | $1.97 \times 10^{-1}$ |
|                |     | Grayscale  | 0.908 (0.842 - 0.988) | $2.77 \times 10^{-29}$ | 0.898 (0.739 - 0.990) | $1.13 \times 10^{-20}$ | $3.09 \times 10^{-1}$ |
|                |     | Normalized | 0.916 (0.855 - 0.976) | $2.58 \times 10^{-31}$ | 0.911 (0.792 - 0.988) | $9.57 \times 10^{-23}$ | $4.33 \times 10^{-1}$ |
|                |     | Light      | 0.931 (0.883 - 0.979) | $1.03 \times 10^{-32}$ | 0.897 (0.785 - 0.980) | $7.64 \times 10^{-22}$ | $1.74 \times 10^{-2}$ |
|                |     | Heavy      | 0.941 (0.911 - 0.976) | $4.08 \times 10^{-36}$ | 0.905 (0.795 - 0.981) | $1.92 \times 10^{-23}$ | $3.47 \times 10^{-3}$ |
| PFS            |     | Baseline   | 0.614 (0.538 - 0.693) | $5.54 \times 10^{-13}$ | 0.548 (0.431 - 0.728) | $1.48 \times 10^{-3}$  | $6.35 \times 10^{-4}$ |
|                |     | Macenko    | 0.596 (0.360 - 0.738) | $2.01 \times 10^{-5}$  | 0.417 (0.248 - 0.607) | $1.00 \times 10^{-0}$  | $1.37 \times 10^{-6}$ |
|                |     | Reinhard   | 0.560 (0.453 - 0.640) | $9.53 \times 10^{-8}$  | 0.483 (0.314 - 0.610) | $9.79 \times 10^{-1}$  | $1.36 \times 10^{-4}$ |
|                |     | Grayscale  | 0.547 (0.413 - 0.702) | $5.69 \times 10^{-4}$  | 0.512 (0.308 - 0.701) | $3.24 \times 10^{-1}$  | $1.11 \times 10^{-1}$ |
|                |     | Normalized | 0.532 (0.359 - 0.673) | $3.26 \times 10^{-2}$  | 0.492 (0.360 - 0.643) | $8.54 \times 10^{-1}$  | $8.10 \times 10^{-2}$ |
|                |     | Light      | 0.579 (0.418 - 0.698) | $8.70 \times 10^{-6}$  | 0.463 (0.348 - 0.581) | $1.00 \times 10^{-0}$  | $1.37 \times 10^{-6}$ |
|                |     | Heavy      | 0.560 (0.399 - 0.659) | $4.50 \times 10^{-5}$  | 0.493 (0.383 - 0.633) | $8.54 \times 10^{-1}$  | $1.19 \times 10^{-3}$ |
| RHOA           |     | Baseline   | 0.733 (0.371 - 0.993) | $5.96 \times 10^{-5}$  | 0.470 (0.347 - 0.857) | $9.79 \times 10^{-1}$  | $1.36 \times 10^{-4}$ |
|                |     | Macenko    | 0.621 (0.303 - 0.986) | $2.44 \times 10^{-2}$  | 0.598 (0.260 - 0.952) | $4.08 \times 10^{-2}$  | $4.47 \times 10^{-1}$ |
|                |     | Reinhard   | 0.600 (0.238 - 0.993) | $6.56 \times 10^{-2}$  | 0.315 (0.200 - 0.449) | $1.00 \times 10^{-0}$  | $3.79 \times 10^{-4}$ |
|                |     | Grayscale  | 0.695 (0.236 - 0.986) | $1.35 \times 10^{-3}$  | 0.562 (0.234 - 0.964) | $2.15 \times 10^{-1}$  | $1.11 \times 10^{-1}$ |
|                |     | Normalized | 0.664 (0.204 - 0.993) | $8.58 \times 10^{-3}$  | 0.381 (0.134 - 0.926) | $1.00 \times 10^{-0}$  | $2.42 \times 10^{-3}$ |
|                |     | Light      | 0.646 (0.187 - 0.986) | $1.49 \times 10^{-2}$  | 0.472 (0.186 - 0.980) | $8.41 \times 10^{-1}$  | $6.04 \times 10^{-2}$ |
|                |     | Heavy      | 0.629 (0.153 - 0.986) | $3.14 \times 10^{-2}$  | 0.479 (0.163 - 0.946) | $7.84 \times 10^{-1}$  | $1.11 \times 10^{-1}$ |
| TP53           |     | Baseline   | 0.679 (0.557 - 0.840) | $8.19 \times 10^{-14}$ | 0.691 (0.581 - 0.803) | $6.09 \times 10^{-14}$ | $7.98 \times 10^{-1}$ |
|                |     | Macenko    | 0.683 (0.548 - 0.818) | $2.42 \times 10^{-14}$ | 0.683 (0.581 - 0.810) | $5.60 \times 10^{-14}$ | $5.69 \times 10^{-1}$ |
|                |     | Reinhard   | 0.716 (0.585 - 0.886) | $1.67 \times 10^{-13}$ | 0.699 (0.609 - 0.850) | $9.64 \times 10^{-16}$ | $2.66 \times 10^{-1}$ |
|                |     | Grayscale  | 0.712 (0.628 - 0.840) | $1.35 \times 10^{-16}$ | 0.692 (0.556 - 0.793) | $1.41 \times 10^{-13}$ | $2.10 \times 10^{-1}$ |
|                |     | Normalized | 0.709 (0.603 - 0.887) | $1.71 \times 10^{-14}$ | 0.675 (0.578 - 0.806) | $5.27 \times 10^{-15}$ | $6.08 \times 10^{-2}$ |
|                |     | Light      | 0.717 (0.585 - 0.855) | $1.52 \times 10^{-15}$ | 0.702 (0.567 - 0.823) | $1.04 \times 10^{-12}$ | $2.86 \times 10^{-1}$ |
|                |     | Heavy      | 0.714 (0.590 - 0.888) | $1.41 \times 10^{-13}$ | 0.694 (0.570 - 0.824) | $5.52 \times 10^{-13}$ | $2.50 \times 10^{-1}$ |
| Immune Subtype |     | Baseline   | 0.651 (0.547 - 0.755) | $1.49 \times 10^{-14}$ | 0.630 (0.443 - 0.750) | $2.91 \times 10^{-8}$  | $2.17 \times 10^{-1}$ |
|                |     | Macenko    | 0.728 (0.637 - 0.819) | $4.50 \times 10^{-20}$ | 0.740 (0.598 - 0.843) | $4.59 \times 10^{-16}$ | $8.15 \times 10^{-1}$ |
|                |     | Reinhard   | 0.722 (0.617 - 0.847) | $5.86 \times 10^{-17}$ | 0.678 (0.498 - 0.821) | $9.48 \times 10^{-11}$ | $5.05 \times 10^{-2}$ |
|                |     | Grayscale  | 0.680 (0.549 - 0.775) | $1.49 \times 10^{-14}$ | 0.649 (0.463 - 0.761) | $3.17 \times 10^{-11}$ | $9.49 \times 10^{-2}$ |
|                |     | Normalized | 0.749 (0.644 - 0.866) | $3.52 \times 10^{-16}$ | 0.711 (0.576 - 0.778) | $2.29 \times 10^{-16}$ | $5.05 \times 10^{-2}$ |
|                |     | Light      | 0.676 (0.547 - 0.795) | $1.54 \times 10^{-14}$ | 0.652 (0.526 - 0.750) | $1.64 \times 10^{-13}$ | $1.23 \times 10^{-1}$ |
|                |     | Heavy      | 0.717 (0.570 - 0.856) | $1.89 \times 10^{-15}$ | 0.664 (0.508 - 0.764) | $3.25 \times 10^{-12}$ | $8.38 \times 10^{-3}$ |
| KIRC           | Age | Baseline   | 0.561 (0.542 - 0.579) | $2.93 \times 10^{-6}$  | 0.526 (0.487 - 0.565) | $1.45 \times 10^{-1}$  | $1.98 \times 10^{-2}$ |

|      |                |            |                       |                        |                       |                        |                       |
|------|----------------|------------|-----------------------|------------------------|-----------------------|------------------------|-----------------------|
|      |                | Macenko    | 0.585 (0.536 - 0.635) | $9.62 \times 10^{-11}$ | 0.507 (0.498 - 0.516) | $9.14 \times 10^{-3}$  | $2.19 \times 10^{-3}$ |
|      |                | Reinhard   | 0.604 (0.574 - 0.633) | $1.21 \times 10^{-7}$  | 0.533 (0.483 - 0.582) | $4.05 \times 10^{-1}$  | $1.61 \times 10^{-5}$ |
|      |                | Grayscale  | 0.528 (0.491 - 0.565) | $1.58 \times 10^{-2}$  | 0.522 (0.432 - 0.612) | $7.52 \times 10^{-2}$  | $7.26 \times 10^{-1}$ |
|      |                | Normalized | 0.581 (0.524 - 0.638) | $4.80 \times 10^{-7}$  | 0.546 (0.494 - 0.598) | $8.55 \times 10^{-5}$  | $5.35 \times 10^{-1}$ |
|      |                | Light      | 0.534 (0.477 - 0.592) | $5.94 \times 10^{-2}$  | 0.531 (0.498 - 0.564) | $7.76 \times 10^{-3}$  | $8.84 \times 10^{-1}$ |
|      |                | Heavy      | 0.525 (0.486 - 0.564) | $2.23 \times 10^{-2}$  | 0.547 (0.478 - 0.616) | $3.38 \times 10^{-3}$  | $9.35 \times 10^{-1}$ |
|      | Stage          | Baseline   | 0.649 (0.576 - 0.730) | $2.74 \times 10^{-17}$ | 0.582 (0.466 - 0.746) | $7.40 \times 10^{-6}$  | $6.98 \times 10^{-4}$ |
|      |                | Macenko    | 0.685 (0.616 - 0.743) | $3.31 \times 10^{-20}$ | 0.607 (0.541 - 0.710) | $5.08 \times 10^{-13}$ | $6.99 \times 10^{-9}$ |
|      |                | Reinhard   | 0.645 (0.575 - 0.702) | $5.26 \times 10^{-18}$ | 0.602 (0.453 - 0.749) | $1.52 \times 10^{-6}$  | $3.00 \times 10^{-2}$ |
|      |                | Grayscale  | 0.646 (0.583 - 0.698) | $4.40 \times 10^{-19}$ | 0.636 (0.497 - 0.756) | $1.07 \times 10^{-11}$ | $3.09 \times 10^{-1}$ |
|      |                | Normalized | 0.671 (0.586 - 0.745) | $3.31 \times 10^{-20}$ | 0.648 (0.539 - 0.758) | $1.62 \times 10^{-13}$ | $5.29 \times 10^{-2}$ |
|      |                | Light      | 0.644 (0.566 - 0.699) | $5.08 \times 10^{-19}$ | 0.615 (0.465 - 0.747) | $2.20 \times 10^{-7}$  | $9.44 \times 10^{-2}$ |
|      |                | Heavy      | 0.652 (0.573 - 0.701) | $3.18 \times 10^{-19}$ | 0.620 (0.476 - 0.746) | $1.23 \times 10^{-7}$  | $6.68 \times 10^{-2}$ |
|      | Gender         | Baseline   | 0.656 (0.534 - 0.748) | $1.29 \times 10^{-14}$ | 0.600 (0.497 - 0.708) | $7.10 \times 10^{-10}$ | $1.02 \times 10^{-3}$ |
|      |                | Macenko    | 0.663 (0.568 - 0.724) | $2.29 \times 10^{-16}$ | 0.610 (0.504 - 0.712) | $5.19 \times 10^{-12}$ | $4.00 \times 10^{-4}$ |
|      |                | Reinhard   | 0.662 (0.584 - 0.750) | $2.68 \times 10^{-16}$ | 0.577 (0.474 - 0.724) | $2.76 \times 10^{-6}$  | $1.18 \times 10^{-5}$ |
|      |                | Grayscale  | 0.652 (0.536 - 0.733) | $4.23 \times 10^{-15}$ | 0.630 (0.508 - 0.702) | $6.88 \times 10^{-13}$ | $8.06 \times 10^{-2}$ |
|      |                | Normalized | 0.633 (0.530 - 0.712) | $9.80 \times 10^{-14}$ | 0.626 (0.542 - 0.718) | $7.72 \times 10^{-13}$ | $3.93 \times 10^{-1}$ |
|      |                | Light      | 0.662 (0.580 - 0.757) | $2.86 \times 10^{-15}$ | 0.623 (0.542 - 0.742) | $1.12 \times 10^{-12}$ | $9.48 \times 10^{-3}$ |
|      |                | Heavy      | 0.676 (0.616 - 0.736) | $1.02 \times 10^{-18}$ | 0.637 (0.553 - 0.720) | $2.43 \times 10^{-14}$ | $2.19 \times 10^{-3}$ |
|      | Grade          | Baseline   | 0.683 (0.597 - 0.829) | $2.57 \times 10^{-16}$ | 0.665 (0.553 - 0.781) | $2.43 \times 10^{-14}$ | $1.72 \times 10^{-1}$ |
|      |                | Macenko    | 0.739 (0.590 - 0.822) | $3.31 \times 10^{-20}$ | 0.660 (0.539 - 0.764) | $1.48 \times 10^{-13}$ | $4.07 \times 10^{-6}$ |
|      |                | Reinhard   | 0.687 (0.580 - 0.827) | $1.29 \times 10^{-16}$ | 0.661 (0.507 - 0.806) | $1.12 \times 10^{-12}$ | $8.74 \times 10^{-2}$ |
|      |                | Grayscale  | 0.702 (0.587 - 0.790) | $5.27 \times 10^{-18}$ | 0.673 (0.526 - 0.787) | $2.43 \times 10^{-14}$ | $5.09 \times 10^{-2}$ |
|      |                | Normalized | 0.730 (0.585 - 0.800) | $3.18 \times 10^{-19}$ | 0.702 (0.562 - 0.809) | $5.42 \times 10^{-15}$ | $5.36 \times 10^{-2}$ |
|      |                | Light      | 0.717 (0.602 - 0.808) | $1.62 \times 10^{-18}$ | 0.687 (0.568 - 0.802) | $1.72 \times 10^{-14}$ | $5.09 \times 10^{-2}$ |
|      |                | Heavy      | 0.724 (0.618 - 0.802) | $3.18 \times 10^{-19}$ | 0.696 (0.580 - 0.790) | $8.48 \times 10^{-17}$ | $4.70 \times 10^{-2}$ |
|      | Ancestry       | Baseline   | 0.759 (0.476 - 0.933) | $3.49 \times 10^{-11}$ | 0.667 (0.135 - 0.903) | $6.88 \times 10^{-5}$  | $5.09 \times 10^{-2}$ |
|      |                | Macenko    | 0.744 (0.518 - 0.910) | $3.08 \times 10^{-10}$ | 0.615 (0.341 - 0.795) | $8.03 \times 10^{-6}$  | $7.83 \times 10^{-4}$ |
|      |                | Reinhard   | 0.743 (0.541 - 0.915) | $2.57 \times 10^{-13}$ | 0.559 (0.279 - 0.778) | $3.01 \times 10^{-2}$  | $1.18 \times 10^{-5}$ |
|      |                | Grayscale  | 0.703 (0.466 - 0.883) | $1.24 \times 10^{-10}$ | 0.512 (0.315 - 0.759) | $3.27 \times 10^{-1}$  | $2.61 \times 10^{-6}$ |
|      |                | Normalized | 0.776 (0.586 - 0.937) | $1.83 \times 10^{-14}$ | 0.685 (0.443 - 0.929) | $5.16 \times 10^{-7}$  | $1.49 \times 10^{-2}$ |
|      |                | Light      | 0.708 (0.493 - 0.879) | $2.45 \times 10^{-10}$ | 0.633 (0.329 - 0.883) | $1.44 \times 10^{-5}$  | $3.95 \times 10^{-2}$ |
|      |                | Heavy      | 0.715 (0.492 - 0.906) | $4.84 \times 10^{-11}$ | 0.621 (0.383 - 0.864) | $1.89 \times 10^{-5}$  | $7.89 \times 10^{-3}$ |
|      | PFS            | Baseline   | 0.744 (0.613 - 0.875) | $5.05 \times 10^{-17}$ | 0.680 (0.384 - 0.877) | $2.01 \times 10^{-6}$  | $5.29 \times 10^{-2}$ |
|      |                | Macenko    | 0.756 (0.624 - 0.911) | $2.74 \times 10^{-17}$ | 0.708 (0.492 - 0.850) | $1.08 \times 10^{-10}$ | $5.09 \times 10^{-2}$ |
|      |                | Reinhard   | 0.739 (0.605 - 0.841) | $3.18 \times 10^{-19}$ | 0.688 (0.444 - 0.866) | $4.42 \times 10^{-8}$  | $5.36 \times 10^{-2}$ |
|      |                | Grayscale  | 0.712 (0.596 - 0.841) | $8.05 \times 10^{-16}$ | 0.710 (0.536 - 0.867) | $2.71 \times 10^{-12}$ | $5.35 \times 10^{-1}$ |
|      |                | Normalized | 0.717 (0.608 - 0.806) | $5.80 \times 10^{-18}$ | 0.690 (0.495 - 0.879) | $3.25 \times 10^{-9}$  | $1.93 \times 10^{-1}$ |
|      |                | Light      | 0.715 (0.568 - 0.833) | $6.69 \times 10^{-17}$ | 0.704 (0.532 - 0.897) | $9.70 \times 10^{-11}$ | $4.06 \times 10^{-1}$ |
|      |                | Heavy      | 0.721 (0.573 - 0.833) | $3.92 \times 10^{-17}$ | 0.724 (0.554 - 0.905) | $8.46 \times 10^{-12}$ | $6.34 \times 10^{-1}$ |
|      | Immune Subtype | Baseline   | 0.643 (0.376 - 0.790) | $9.98 \times 10^{-7}$  | 0.679 (0.383 - 0.952) | $1.99 \times 10^{-7}$  | $8.85 \times 10^{-1}$ |
|      |                | Macenko    | 0.688 (0.482 - 0.867) | $1.64 \times 10^{-9}$  | 0.674 (0.487 - 0.892) | $9.00 \times 10^{-9}$  | $4.06 \times 10^{-1}$ |
|      |                | Reinhard   | 0.648 (0.359 - 0.874) | $2.13 \times 10^{-5}$  | 0.742 (0.489 - 0.908) | $1.73 \times 10^{-12}$ | $9.95 \times 10^{-1}$ |
|      |                | Grayscale  | 0.734 (0.188 - 0.891) | $8.64 \times 10^{-9}$  | 0.723 (0.543 - 0.909) | $2.71 \times 10^{-12}$ | $4.61 \times 10^{-1}$ |
|      |                | Normalized | 0.744 (0.362 - 0.927) | $1.19 \times 10^{-9}$  | 0.703 (0.446 - 0.880) | $4.17 \times 10^{-10}$ | $1.72 \times 10^{-1}$ |
|      |                | Light      | 0.699 (0.456 - 0.909) | $1.76 \times 10^{-9}$  | 0.717 (0.597 - 0.949) | $8.57 \times 10^{-12}$ | $7.90 \times 10^{-1}$ |
|      |                | Heavy      | 0.768 (0.591 - 0.942) | $5.78 \times 10^{-14}$ | 0.748 (0.582 - 0.931) | $1.90 \times 10^{-12}$ | $3.14 \times 10^{-1}$ |
| LUAD | Age            | Baseline   | 0.528 (0.420 - 0.610) | $3.15 \times 10^{-3}$  | 0.481 (0.297 - 0.606) | $1.00 \times 10^0$     | $4.78 \times 10^{-3}$ |



|            |            |                       |                        |                       |                        |                       |
|------------|------------|-----------------------|------------------------|-----------------------|------------------------|-----------------------|
|            | Macenko    | 0.556 (0.455 - 0.670) | $6.09 \times 10^{-7}$  | 0.519 (0.454 - 0.613) | $2.65 \times 10^{-2}$  | $4.72 \times 10^{-3}$ |
|            | Reinhard   | 0.549 (0.418 - 0.649) | $5.37 \times 10^{-5}$  | 0.588 (0.499 - 0.659) | $1.76 \times 10^{-9}$  | $9.98 \times 10^{-1}$ |
|            | Grayscale  | 0.518 (0.374 - 0.597) | $6.12 \times 10^{-2}$  | 0.554 (0.432 - 0.671) | $2.21 \times 10^{-4}$  | $9.98 \times 10^{-1}$ |
|            | Normalized | 0.505 (0.365 - 0.617) | $3.81 \times 10^{-1}$  | 0.550 (0.458 - 0.623) | $5.84 \times 10^{-6}$  | $9.98 \times 10^{-1}$ |
|            | Light      | 0.513 (0.426 - 0.598) | $1.23 \times 10^{-1}$  | 0.504 (0.413 - 0.619) | $4.61 \times 10^{-1}$  | $4.43 \times 10^{-1}$ |
|            | Heavy      | 0.500 (0.406 - 0.589) | $5.44 \times 10^{-1}$  | 0.503 (0.429 - 0.616) | $4.66 \times 10^{-1}$  | $7.87 \times 10^{-1}$ |
| Stage      | Baseline   | 0.599 (0.520 - 0.706) | $2.46 \times 10^{-11}$ | 0.521 (0.416 - 0.637) | $8.10 \times 10^{-2}$  | $7.76 \times 10^{-6}$ |
|            | Macenko    | 0.605 (0.528 - 0.682) | $2.29 \times 10^{-12}$ | 0.538 (0.389 - 0.639) | $5.27 \times 10^{-3}$  | $1.00 \times 10^{-4}$ |
|            | Reinhard   | 0.582 (0.508 - 0.661) | $7.44 \times 10^{-11}$ | 0.501 (0.384 - 0.599) | $6.13 \times 10^{-1}$  | $5.96 \times 10^{-7}$ |
|            | Grayscale  | 0.609 (0.495 - 0.677) | $5.15 \times 10^{-13}$ | 0.528 (0.435 - 0.637) | $1.11 \times 10^{-2}$  | $5.33 \times 10^{-7}$ |
|            | Normalized | 0.627 (0.551 - 0.718) | $1.42 \times 10^{-14}$ | 0.579 (0.471 - 0.663) | $1.42 \times 10^{-8}$  | $4.36 \times 10^{-4}$ |
|            | Light      | 0.592 (0.477 - 0.694) | $3.14 \times 10^{-9}$  | 0.499 (0.402 - 0.634) | $7.03 \times 10^{-1}$  | $2.07 \times 10^{-6}$ |
|            | Heavy      | 0.593 (0.501 - 0.704) | $7.64 \times 10^{-10}$ | 0.509 (0.402 - 0.633) | $3.28 \times 10^{-1}$  | $4.42 \times 10^{-6}$ |
| Gender     | Baseline   | 0.551 (0.431 - 0.700) | $1.41 \times 10^{-3}$  | 0.498 (0.406 - 0.591) | $9.72 \times 10^{-1}$  | $8.39 \times 10^{-3}$ |
|            | Macenko    | 0.603 (0.499 - 0.711) | $3.80 \times 10^{-5}$  | 0.572 (0.439 - 0.670) | $9.53 \times 10^{-3}$  | $1.29 \times 10^{-1}$ |
|            | Reinhard   | 0.578 (0.425 - 0.718) | $9.05 \times 10^{-9}$  | 0.519 (0.429 - 0.608) | $1.06 \times 10^{-1}$  | $2.81 \times 10^{-5}$ |
|            | Grayscale  | 0.577 (0.458 - 0.718) | $5.66 \times 10^{-3}$  | 0.512 (0.398 - 0.622) | $1.10 \times 10^{-3}$  | $6.25 \times 10^{-1}$ |
|            | Normalized | 0.587 (0.455 - 0.714) | $9.01 \times 10^{-12}$ | 0.544 (0.420 - 0.609) | $8.39 \times 10^{-6}$  | $3.86 \times 10^{-5}$ |
|            | Light      | 0.572 (0.467 - 0.673) | $1.31 \times 10^{-6}$  | 0.560 (0.473 - 0.646) | $3.43 \times 10^{-5}$  | $3.00 \times 10^{-3}$ |
|            | Heavy      | 0.601 (0.495 - 0.705) | $2.48 \times 10^{-8}$  | 0.591 (0.518 - 0.677) | $9.21 \times 10^{-3}$  | $1.56 \times 10^{-5}$ |
| ALK Fusion | Baseline   | 0.637 (0.411 - 0.867) | $2.06 \times 10^{-5}$  | 0.417 (0.213 - 0.630) | $1.00 \times 10^{-0}$  | $2.80 \times 10^{-7}$ |
|            | Macenko    | 0.651 (0.518 - 0.833) | $2.71 \times 10^{-9}$  | 0.483 (0.313 - 0.668) | $9.66 \times 10^{-1}$  | $2.80 \times 10^{-7}$ |
|            | Reinhard   | 0.617 (0.424 - 0.947) | $9.94 \times 10^{-6}$  | 0.408 (0.234 - 0.597) | $1.00 \times 10^{-0}$  | $5.95 \times 10^{-8}$ |
|            | Grayscale  | 0.541 (0.254 - 0.727) | $8.37 \times 10^{-2}$  | 0.401 (0.292 - 0.649) | $1.00 \times 10^{-0}$  | $1.29 \times 10^{-4}$ |
|            | Normalized | 0.547 (0.361 - 0.738) | $1.24 \times 10^{-2}$  | 0.451 (0.189 - 0.695) | $1.00 \times 10^{-0}$  | $4.78 \times 10^{-3}$ |
|            | Light      | 0.618 (0.384 - 0.973) | $8.73 \times 10^{-5}$  | 0.428 (0.248 - 0.646) | $1.00 \times 10^{-0}$  | $2.14 \times 10^{-6}$ |
|            | Heavy      | 0.599 (0.376 - 0.880) | $2.79 \times 10^{-4}$  | 0.408 (0.246 - 0.583) | $1.00 \times 10^{-0}$  | $3.59 \times 10^{-7}$ |
| Ancestry   | Baseline   | 0.678 (0.435 - 0.960) | $5.00 \times 10^{-8}$  | 0.657 (0.476 - 0.872) | $1.88 \times 10^{-8}$  | $4.20 \times 10^{-1}$ |
|            | Macenko    | 0.715 (0.580 - 0.954) | $9.91 \times 10^{-13}$ | 0.648 (0.458 - 0.820) | $1.91 \times 10^{-9}$  | $6.18 \times 10^{-3}$ |
|            | Reinhard   | 0.684 (0.453 - 0.951) | $2.44 \times 10^{-7}$  | 0.607 (0.340 - 0.805) | $4.63 \times 10^{-5}$  | $3.08 \times 10^{-2}$ |
|            | Grayscale  | 0.598 (0.396 - 0.783) | $4.35 \times 10^{-5}$  | 0.537 (0.293 - 0.735) | $1.01 \times 10^{-1}$  | $5.08 \times 10^{-2}$ |
|            | Normalized | 0.625 (0.526 - 0.840) | $3.31 \times 10^{-9}$  | 0.517 (0.234 - 0.779) | $4.03 \times 10^{-1}$  | $2.85 \times 10^{-3}$ |
|            | Light      | 0.642 (0.447 - 0.924) | $2.62 \times 10^{-7}$  | 0.556 (0.297 - 0.739) | $4.50 \times 10^{-3}$  | $3.81 \times 10^{-3}$ |
|            | Heavy      | 0.630 (0.494 - 0.902) | $3.17 \times 10^{-7}$  | 0.522 (0.286 - 0.704) | $2.28 \times 10^{-1}$  | $7.39 \times 10^{-4}$ |
| PFS        | Baseline   | 0.525 (0.361 - 0.620) | $5.53 \times 10^{-2}$  | 0.523 (0.344 - 0.692) | $1.56 \times 10^{-1}$  | $6.81 \times 10^{-1}$ |
|            | Macenko    | 0.535 (0.371 - 0.634) | $2.41 \times 10^{-3}$  | 0.467 (0.360 - 0.574) | $1.00 \times 10^{-0}$  | $2.44 \times 10^{-4}$ |
|            | Reinhard   | 0.488 (0.365 - 0.620) | $9.03 \times 10^{-1}$  | 0.495 (0.322 - 0.633) | $7.54 \times 10^{-1}$  | $8.24 \times 10^{-1}$ |
|            | Grayscale  | 0.473 (0.375 - 0.584) | $9.99 \times 10^{-1}$  | 0.471 (0.304 - 0.633) | $1.00 \times 10^{-0}$  | $6.81 \times 10^{-1}$ |
|            | Normalized | 0.455 (0.300 - 0.665) | $9.99 \times 10^{-1}$  | 0.486 (0.347 - 0.664) | $9.66 \times 10^{-1}$  | $9.98 \times 10^{-1}$ |
|            | Light      | 0.517 (0.391 - 0.638) | $7.52 \times 10^{-2}$  | 0.514 (0.380 - 0.630) | $2.15 \times 10^{-1}$  | $6.63 \times 10^{-1}$ |
|            | Heavy      | 0.464 (0.364 - 0.596) | $9.99 \times 10^{-1}$  | 0.475 (0.318 - 0.582) | $1.00 \times 10^{-0}$  | $9.12 \times 10^{-1}$ |
| STK11      | Baseline   | 0.645 (0.528 - 0.804) | $1.83 \times 10^{-10}$ | 0.660 (0.468 - 0.834) | $3.00 \times 10^{-8}$  | $9.12 \times 10^{-1}$ |
|            | Macenko    | 0.708 (0.575 - 0.858) | $1.36 \times 10^{-13}$ | 0.667 (0.448 - 0.850) | $3.52 \times 10^{-9}$  | $7.83 \times 10^{-2}$ |
|            | Reinhard   | 0.663 (0.531 - 0.772) | $3.66 \times 10^{-12}$ | 0.725 (0.495 - 0.895) | $3.01 \times 10^{-10}$ | $9.98 \times 10^{-1}$ |
|            | Grayscale  | 0.625 (0.462 - 0.780) | $5.11 \times 10^{-8}$  | 0.622 (0.429 - 0.840) | $5.92 \times 10^{-5}$  | $6.81 \times 10^{-1}$ |
|            | Normalized | 0.654 (0.548 - 0.750) | $6.81 \times 10^{-13}$ | 0.653 (0.523 - 0.797) | $2.59 \times 10^{-10}$ | $7.01 \times 10^{-1}$ |
|            | Light      | 0.624 (0.507 - 0.735) | $4.47 \times 10^{-10}$ | 0.649 (0.347 - 0.865) | $1.11 \times 10^{-5}$  | $9.57 \times 10^{-1}$ |
|            | Heavy      | 0.649 (0.515 - 0.766) | $2.92 \times 10^{-11}$ | 0.657 (0.440 - 0.889) | $3.75 \times 10^{-6}$  | $7.87 \times 10^{-1}$ |
| TP53       | Baseline   | 0.667 (0.547 - 0.778) | $1.36 \times 10^{-13}$ | 0.709 (0.584 - 0.794) | $4.19 \times 10^{-16}$ | $9.98 \times 10^{-1}$ |

|                |            |                       |                        |                       |                        |                        |
|----------------|------------|-----------------------|------------------------|-----------------------|------------------------|------------------------|
|                | Macenko    | 0.709 (0.483 - 0.841) | $3.09 \times 10^{-13}$ | 0.712 (0.615 - 0.786) | $1.00 \times 10^{-18}$ | $7.85 \times 10^{-1}$  |
|                | Reinhard   | 0.701 (0.549 - 0.817) | $2.50 \times 10^{-15}$ | 0.719 (0.617 - 0.810) | $2.93 \times 10^{-18}$ | $9.98 \times 10^{-1}$  |
|                | Grayscale  | 0.679 (0.544 - 0.802) | $8.58 \times 10^{-15}$ | 0.710 (0.640 - 0.798) | $2.13 \times 10^{-18}$ | $9.98 \times 10^{-1}$  |
|                | Normalized | 0.702 (0.576 - 0.795) | $8.58 \times 10^{-15}$ | 0.729 (0.642 - 0.800) | $3.18 \times 10^{-21}$ | $9.98 \times 10^{-1}$  |
|                | Light      | 0.671 (0.567 - 0.782) | $1.42 \times 10^{-14}$ | 0.707 (0.632 - 0.774) | $1.82 \times 10^{-20}$ | $9.98 \times 10^{-1}$  |
|                | Heavy      | 0.669 (0.562 - 0.792) | $9.51 \times 10^{-14}$ | 0.705 (0.634 - 0.777) | $1.36 \times 10^{-20}$ | $9.98 \times 10^{-1}$  |
| Immune Subtype | Baseline   | 0.598 (0.527 - 0.680) | $7.01 \times 10^{-12}$ | 0.529 (0.426 - 0.616) | $3.73 \times 10^{-3}$  | $2.67 \times 10^{-6}$  |
|                | Macenko    | 0.646 (0.549 - 0.769) | $4.76 \times 10^{-13}$ | 0.600 (0.524 - 0.691) | $1.37 \times 10^{-10}$ | $3.66 \times 10^{-3}$  |
|                | Reinhard   | 0.650 (0.569 - 0.765) | $1.42 \times 10^{-14}$ | 0.612 (0.517 - 0.714) | $1.14 \times 10^{-12}$ | $4.25 \times 10^{-3}$  |
|                | Grayscale  | 0.644 (0.552 - 0.780) | $6.81 \times 10^{-13}$ | 0.645 (0.559 - 0.726) | $1.86 \times 10^{-16}$ | $7.21 \times 10^{-1}$  |
|                | Normalized | 0.661 (0.552 - 0.804) | $4.89 \times 10^{-12}$ | 0.625 (0.540 - 0.766) | $1.14 \times 10^{-12}$ | $3.02 \times 10^{-2}$  |
|                | Light      | 0.647 (0.552 - 0.745) | $1.02 \times 10^{-13}$ | 0.615 (0.518 - 0.710) | $2.06 \times 10^{-11}$ | $2.48 \times 10^{-2}$  |
|                | Heavy      | 0.664 (0.582 - 0.760) | $1.52 \times 10^{-15}$ | 0.627 (0.501 - 0.732) | $8.50 \times 10^{-11}$ | $1.36 \times 10^{-2}$  |
| Age            | Baseline   | 0.532 (0.404 - 0.680) | $1.07 \times 10^{-2}$  | 0.476 (0.306 - 0.713) | $1.00 \times 10^{-0}$  | $1.21 \times 10^{-2}$  |
|                | Macenko    | 0.475 (0.333 - 0.641) | $9.47 \times 10^{-1}$  | 0.459 (0.344 - 0.565) | $1.00 \times 10^{-0}$  | $2.21 \times 10^{-1}$  |
|                | Reinhard   | 0.542 (0.361 - 0.674) | $6.09 \times 10^{-3}$  | 0.485 (0.339 - 0.638) | $1.00 \times 10^{-0}$  | $6.71 \times 10^{-3}$  |
|                | Grayscale  | 0.470 (0.229 - 0.652) | $9.47 \times 10^{-1}$  | 0.495 (0.344 - 0.625) | $1.00 \times 10^{-0}$  | $8.67 \times 10^{-1}$  |
|                | Normalized | 0.515 (0.267 - 0.757) | $2.33 \times 10^{-1}$  | 0.497 (0.327 - 0.640) | $1.00 \times 10^{-0}$  | $2.35 \times 10^{-1}$  |
|                | Light      | 0.521 (0.357 - 0.711) | $1.00 \times 10^{-1}$  | 0.469 (0.348 - 0.664) | $1.00 \times 10^{-0}$  | $1.38 \times 10^{-2}$  |
|                | Heavy      | 0.506 (0.373 - 0.697) | $3.58 \times 10^{-1}$  | 0.480 (0.323 - 0.678) | $1.00 \times 10^{-0}$  | $1.29 \times 10^{-1}$  |
| Stage          | Baseline   | 0.537 (0.440 - 0.633) | $1.54 \times 10^{-3}$  | 0.466 (0.348 - 0.599) | $1.00 \times 10^{-0}$  | $2.64 \times 10^{-5}$  |
|                | Macenko    | 0.553 (0.453 - 0.652) | $1.57 \times 10^{-4}$  | 0.476 (0.395 - 0.541) | $1.00 \times 10^{-0}$  | $1.72 \times 10^{-6}$  |
|                | Reinhard   | 0.573 (0.474 - 0.678) | $1.17 \times 10^{-5}$  | 0.475 (0.411 - 0.548) | $1.00 \times 10^{-0}$  | $1.65 \times 10^{-7}$  |
|                | Grayscale  | 0.557 (0.449 - 0.675) | $2.12 \times 10^{-4}$  | 0.471 (0.368 - 0.606) | $1.00 \times 10^{-0}$  | $1.56 \times 10^{-5}$  |
|                | Normalized | 0.598 (0.475 - 0.699) | $1.93 \times 10^{-7}$  | 0.557 (0.433 - 0.729) | $2.27 \times 10^{-3}$  | $2.80 \times 10^{-2}$  |
|                | Light      | 0.555 (0.470 - 0.694) | $1.83 \times 10^{-4}$  | 0.486 (0.364 - 0.586) | $1.00 \times 10^{-0}$  | $4.60 \times 10^{-4}$  |
|                | Heavy      | 0.593 (0.490 - 0.722) | $1.85 \times 10^{-7}$  | 0.493 (0.368 - 0.609) | $1.00 \times 10^{-0}$  | $5.68 \times 10^{-6}$  |
| LUSC           | Baseline   | 0.544 (0.385 - 0.659) | $1.41 \times 10^{-3}$  | 0.502 (0.418 - 0.579) | $9.72 \times 10^{-1}$  | $8.39 \times 10^{-3}$  |
|                | Macenko    | 0.552 (0.423 - 0.672) | $3.80 \times 10^{-5}$  | 0.534 (0.396 - 0.690) | $9.53 \times 10^{-3}$  | $1.29 \times 10^{-1}$  |
|                | Reinhard   | 0.611 (0.458 - 0.715) | $9.05 \times 10^{-9}$  | 0.526 (0.387 - 0.647) | $1.06 \times 10^{-1}$  | $2.81 \times 10^{-5}$  |
|                | Grayscale  | 0.540 (0.367 - 0.669) | $5.66 \times 10^{-3}$  | 0.545 (0.417 - 0.686) | $1.10 \times 10^{-3}$  | $6.25 \times 10^{-1}$  |
|                | Normalized | 0.641 (0.484 - 0.742) | $9.01 \times 10^{-12}$ | 0.570 (0.467 - 0.738) | $8.39 \times 10^{-6}$  | $3.86 \times 10^{-5}$  |
|                | Light      | 0.593 (0.426 - 0.700) | $1.31 \times 10^{-6}$  | 0.543 (0.456 - 0.610) | $3.43 \times 10^{-5}$  | $3.00 \times 10^{-3}$  |
|                | Heavy      | 0.597 (0.441 - 0.672) | $2.48 \times 10^{-8}$  | 0.527 (0.440 - 0.640) | $9.21 \times 10^{-3}$  | $1.56 \times 10^{-5}$  |
| ALK Fusion     | Baseline   | 0.678 (0.276 - 0.989) | $3.37 \times 10^{-4}$  | 0.404 (0.122 - 0.875) | $1.00 \times 10^{-0}$  | $9.29 \times 10^{-5}$  |
|                | Macenko    | 0.673 (0.298 - 0.977) | $4.38 \times 10^{-4}$  | 0.610 (0.180 - 0.905) | $9.53 \times 10^{-3}$  | $1.48 \times 10^{-1}$  |
|                | Reinhard   | 0.757 (0.456 - 0.977) | $1.36 \times 10^{-9}$  | 0.299 (0.006 - 0.773) | $1.00 \times 10^{-0}$  | $2.27 \times 10^{-10}$ |
|                | Grayscale  | 0.595 (0.017 - 0.920) | $4.14 \times 10^{-2}$  | 0.291 (0.110 - 0.432) | $1.00 \times 10^{-0}$  | $1.26 \times 10^{-6}$  |
|                | Normalized | 0.748 (0.421 - 1.000) | $2.53 \times 10^{-9}$  | 0.322 (0.059 - 0.875) | $1.00 \times 10^{-0}$  | $4.06 \times 10^{-9}$  |
|                | Light      | 0.661 (0.234 - 0.977) | $2.88 \times 10^{-4}$  | 0.358 (0.141 - 0.841) | $1.00 \times 10^{-0}$  | $1.64 \times 10^{-6}$  |
|                | Heavy      | 0.653 (0.200 - 0.977) | $8.98 \times 10^{-5}$  | 0.308 (0.090 - 0.591) | $1.00 \times 10^{-0}$  | $2.21 \times 10^{-10}$ |
| Ancestry       | Baseline   | 0.789 (0.472 - 0.983) | $1.68 \times 10^{-10}$ | 0.504 (0.245 - 0.802) | $9.78 \times 10^{-1}$  | $1.26 \times 10^{-9}$  |
|                | Macenko    | 0.713 (0.474 - 0.967) | $4.53 \times 10^{-10}$ | 0.455 (0.257 - 0.747) | $1.00 \times 10^{-0}$  | $1.11 \times 10^{-10}$ |
|                | Reinhard   | 0.721 (0.390 - 0.990) | $1.73 \times 10^{-7}$  | 0.479 (0.260 - 0.703) | $1.00 \times 10^{-0}$  | $7.11 \times 10^{-8}$  |
|                | Grayscale  | 0.596 (0.340 - 0.753) | $1.43 \times 10^{-5}$  | 0.458 (0.162 - 0.757) | $1.00 \times 10^{-0}$  | $3.83 \times 10^{-4}$  |
|                | Normalized | 0.644 (0.370 - 0.833) | $1.19 \times 10^{-6}$  | 0.398 (0.249 - 0.602) | $1.00 \times 10^{-0}$  | $1.32 \times 10^{-10}$ |
|                | Light      | 0.570 (0.279 - 0.778) | $4.42 \times 10^{-3}$  | 0.427 (0.298 - 0.570) | $1.00 \times 10^{-0}$  | $6.95 \times 10^{-6}$  |
|                | Heavy      | 0.581 (0.297 - 0.794) | $1.35 \times 10^{-3}$  | 0.391 (0.217 - 0.619) | $1.00 \times 10^{-0}$  | $2.31 \times 10^{-7}$  |
| PFS            | Baseline   | 0.589 (0.411 - 0.726) | $8.00 \times 10^{-7}$  | 0.485 (0.346 - 0.629) | $1.00 \times 10^{-0}$  | $5.50 \times 10^{-7}$  |

|                |            |                       |                        |                       |                        |                        |
|----------------|------------|-----------------------|------------------------|-----------------------|------------------------|------------------------|
|                | Macenko    | 0.578 (0.438 - 0.781) | $8.36 \times 10^{-6}$  | 0.537 (0.376 - 0.655) | $1.84 \times 10^{-2}$  | $2.40 \times 10^{-2}$  |
|                | Reinhard   | 0.585 (0.464 - 0.795) | $9.13 \times 10^{-6}$  | 0.530 (0.376 - 0.637) | $5.32 \times 10^{-2}$  | $7.35 \times 10^{-3}$  |
|                | Grayscale  | 0.597 (0.410 - 0.750) | $1.53 \times 10^{-5}$  | 0.549 (0.309 - 0.706) | $2.79 \times 10^{-2}$  | $4.26 \times 10^{-2}$  |
|                | Normalized | 0.627 (0.406 - 0.824) | $5.48 \times 10^{-7}$  | 0.574 (0.393 - 0.710) | $6.45 \times 10^{-4}$  | $2.40 \times 10^{-2}$  |
|                | Light      | 0.560 (0.433 - 0.697) | $2.18 \times 10^{-4}$  | 0.461 (0.266 - 0.550) | $1.00 \times 10^{-0}$  | $1.47 \times 10^{-5}$  |
|                | Heavy      | 0.605 (0.448 - 0.800) | $6.90 \times 10^{-7}$  | 0.485 (0.253 - 0.630) | $1.00 \times 10^{-0}$  | $2.20 \times 10^{-5}$  |
| PIK3R1         | Baseline   | 0.614 (0.288 - 1.000) | $2.51 \times 10^{-2}$  | 0.386 (0.245 - 0.691) | $1.00 \times 10^{-0}$  | $3.19 \times 10^{-4}$  |
|                | Macenko    | 0.655 (0.141 - 1.000) | $2.39 \times 10^{-3}$  | 0.294 (0.123 - 0.625) | $1.00 \times 10^{-0}$  | $1.18 \times 10^{-7}$  |
|                | Reinhard   | 0.733 (0.225 - 1.000) | $1.01 \times 10^{-6}$  | 0.371 (0.033 - 0.849) | $1.00 \times 10^{-0}$  | $2.86 \times 10^{-6}$  |
|                | Grayscale  | 0.790 (0.265 - 1.000) | $1.94 \times 10^{-8}$  | 0.651 (0.066 - 0.954) | $8.02 \times 10^{-3}$  | $1.38 \times 10^{-2}$  |
|                | Normalized | 0.730 (0.099 - 1.000) | $9.13 \times 10^{-6}$  | 0.516 (0.079 - 0.901) | $8.70 \times 10^{-1}$  | $7.60 \times 10^{-4}$  |
|                | Light      | 0.670 (0.089 - 1.000) | $4.72 \times 10^{-4}$  | 0.577 (0.066 - 0.947) | $1.20 \times 10^{-1}$  | $8.08 \times 10^{-2}$  |
|                | Heavy      | 0.735 (0.053 - 1.000) | $5.96 \times 10^{-6}$  | 0.588 (0.020 - 0.941) | $1.18 \times 10^{-1}$  | $1.53 \times 10^{-2}$  |
| Immune Subtype | Baseline   | 0.605 (0.509 - 0.672) | $8.71 \times 10^{-12}$ | 0.505 (0.425 - 0.590) | $6.78 \times 10^{-1}$  | $1.32 \times 10^{-10}$ |
|                | Macenko    | 0.620 (0.503 - 0.727) | $7.39 \times 10^{-12}$ | 0.568 (0.468 - 0.701) | $3.43 \times 10^{-5}$  | $8.97 \times 10^{-4}$  |
|                | Reinhard   | 0.628 (0.500 - 0.694) | $7.39 \times 10^{-12}$ | 0.538 (0.426 - 0.675) | $2.92 \times 10^{-3}$  | $1.49 \times 10^{-7}$  |
|                | Grayscale  | 0.616 (0.505 - 0.684) | $7.39 \times 10^{-12}$ | 0.585 (0.460 - 0.662) | $4.92 \times 10^{-7}$  | $2.27 \times 10^{-2}$  |
|                | Normalized | 0.666 (0.551 - 0.766) | $1.59 \times 10^{-13}$ | 0.600 (0.509 - 0.660) | $5.40 \times 10^{-11}$ | $8.05 \times 10^{-6}$  |
|                | Light      | 0.617 (0.489 - 0.743) | $3.28 \times 10^{-9}$  | 0.514 (0.424 - 0.631) | $1.97 \times 10^{-1}$  | $1.18 \times 10^{-7}$  |
|                | Heavy      | 0.614 (0.480 - 0.688) | $7.80 \times 10^{-11}$ | 0.540 (0.447 - 0.646) | $6.23 \times 10^{-5}$  | $5.50 \times 10^{-7}$  |

Standard refers to grayscale standard normalization, Light refers to light hue, saturation, and value augmentation, and

Heavy refers to heavy hue, saturation, and value augmentation. P-values listed are false discovery corrected p-values for one sided t-test comparison to AUROC of 0.50, with significance indicating a better than random performance at predicting the outcome of interest, as well as for a one sided t-test comparing standard to preserved site AUROC, with significance indicating a significant decline in AUROC with site preserved cross validation. P-values listed are Benjamini-Hochberg corrected for a false discovery rate of 0.05, with (\*) indicating p-values maintain significance with correction (calculated per cancer subtype).

**Supplementary Table 8. Summary Statistics for Supplementary Table 6.**

| <b>Stain Normalization</b> | <b>Average Difference in AUROC (Standard vs Preserved Site Cross Validation)</b> | <b>Features Predictable with Standard Cross Validation (%)</b> | <b>Predictable Features with Decrease in AUROC with Preserved Site Validation (%)</b> | <b>Features No Longer Predictable with Preserved site Validation (%)</b> |
|----------------------------|----------------------------------------------------------------------------------|----------------------------------------------------------------|---------------------------------------------------------------------------------------|--------------------------------------------------------------------------|
| Baseline                   | 0.069                                                                            | 56 (96.6)                                                      | 51 (91.1)                                                                             | 20 (35.7)                                                                |
| Macenko                    | 0.053                                                                            | 57 (98.3)                                                      | 50 (87.7)                                                                             | 10 (17.5)                                                                |
| Reinhard                   | 0.072                                                                            | 56 (96.6)                                                      | 48 (85.7)                                                                             | 15 (26.8)                                                                |
| Grayscale                  | 0.047                                                                            | 52 (89.7)                                                      | 44 (84.6)                                                                             | 12 (23.1)                                                                |
| Grayscale Normalized       | 0.056                                                                            | 55 (94.8)                                                      | 49 (89.1)                                                                             | 11 (20.0)                                                                |
| Light HSV Augmentation     | 0.053                                                                            | 52 (89.7)                                                      | 46 (88.5)                                                                             | 13 (25.0)                                                                |
| Heavy HSV Augmentation     | 0.056                                                                            | 55 (94.8)                                                      | 49 (89.1)                                                                             | 14 (25.5)                                                                |

**Supplementary Table 9. False Positive Rate for Prediction of African Ancestry, Balanced by Race versus Preserved Sites.**

| <b>Slide Adjustment Method</b> | <b>False Positive AFR Balanced by Race (%)</b> | <b>False Positive AFR Preserved Sites (%)</b> | <b>Chi-squared statistic</b> | <b>p-value</b>          |
|--------------------------------|------------------------------------------------|-----------------------------------------------|------------------------------|-------------------------|
| Baseline                       | 80.6                                           | 0.1                                           | 2964.3                       | $< 1 \times 10^{-300}$  |
| Macenko                        | 37.4                                           | 3.4                                           | 787.3                        | $4.45 \times 10^{-173}$ |
| Reinhard                       | 48.1                                           | 3.4                                           | 1148.9                       | $1.80 \times 10^{-251}$ |
| Grayscale                      | 36.7                                           | 14.1                                          | 296.6                        | $1.82 \times 10^{-66}$  |
| Grayscale Normalized           | 38.8                                           | 9.3                                           | 521.1                        | $2.89 \times 10^{-115}$ |
| Light HSV Augmentation         | 49.7                                           | 6.0                                           | 1045.4                       | $4.26 \times 10^{-229}$ |
| Heavy HSV Augmentation         | 67.8                                           | 14.6                                          | 1289.7                       | $6.94 \times 10^{-282}$ |

False positive prediction of European ancestry and African ancestry for patients within the University of Chicago dataset (measured at the tile level,  $n = 2,206$  tiles from 20 patients, 17 with African ancestry, 3 with European ancestry) for models trained with standard and preserved site cross validation. Slide normalization techniques improve the false positive rate, but not to the same level as isolating sites to either validation or testing sets. P-values are for a chi-squared test comparing the number of true / false positive predictions for African Ancestry with the two methods of cross validation. P-values listed are Benjamini-Hochberg corrected for a false discovery rate of 0.05, with (\*) indicating p-values maintain significance with correction.
